# Supplementary material
Source: publisher figshare collection journal article supplement (https://springernature.figshare.com/ndownloader/files/21504555)
Supplement: Supplementary file 1 [file 21504555]

## Sheet: Sheet1
Table S1. The ERF family of N. benthamiana
	Gene ID	Designated name	Sequence	Length
1	Niben101Scf08776g00003.1	NBERF1	MEAKKIKRIRESNKHTIYRGVRMRNWGKWVSEIRERGKKSRIWLGTFPTPQMAARAHDVAALAIK	65
2	Niben101Scf02577g03014.1	NBERF2	MSRLNYINKSEQGMHSVYRGIRKRNGKWVSEIREPRKTTRIWLGSYPTPEIAAAAYDVAALALKGPDTR	69
3	Niben101Scf06473g01014.1	NBERF3	MGKWVSEIRVPGSSERLWLGTYTNPEAAAIAHDIDYYCLSSLDELNFPFMLPANVAEVCAKGGLKCWHGH	70
4	Niben101Scf19057g00005.1	NBERF4	MTALPPEKAKHYRGVRVRAWGKFAAKIKDPAKNGARVWMGSIGSKQSSMSPQHSSSSSPKRRKKVSQGTELTVL	74
5	Niben101Scf05173g07004.1	NBERF5	MVAREKNAPQDWRRYIGVRLRQWGTFVEEIRHPNRRNARLWLGTYETPEDATLAYDQAAFDIRGSKARLNFPHLIGST	78
6	Niben101Scf02972g00008.1	NBERF6	MRIWLGTYETAEAAAYAYDRAAYKLRGEYARLNFPNIRDDTSKLGFGDSTKMNAVKNSVDAKIQAICQKVKRERAKKGVKEIVEKSHLEI	90
7	Niben101Scf04505g02007.1	NBERF7	MEIREPKKRTRLWLGSFATAEEAAMAYDEAARRLYGPDAYLNLPHMRANFNPLNKSQKFKWFSSGNFVSSFPNCTTGLLNLSAQPNVHVIHQRLQELKKTEA	102
8	Niben101Ctg00054g00001.1	NBERF8	MAEPTTPNSESESSSYNSCSLSSTISSSSVLIKNINSKNRLKRCREVAEENDGQTNISKCSNSSKKNGGNKTSDGSKHPSYVGVRKRAWGKWVSEIREPKKKSRIWL	107
9	Niben101Scf06413g02012.1	NBERF9	MNTSSCSELLFDSDWPPLFLNTDDVEEQKMISWEKSVSEADFFEVIKCEKVQELPNKEENHYIGVRKRPWGKFAAEIRDSTRNGIRVWLGTFILLKKLLWLMTKLPS	107
10	Niben101Scf04763g00013.1	NBERF10	MSSDDQAGNAPWEEMVKEAAAAAALGGAPRARKRFVGVRQRPSGRWVAEIKDTIQKIRVWLGTFDTAEEAARAYDEAACLLRGANTRTNFWPSSSSSSSTPALPSKITNLLLXE	114
11	Niben101Scf01111g02001.1	NBERF11	MAGLSHTAKSSQLSDIEVENKRSTRTNTKHPVYRGIRCRSGKWVSEIREPRKTTRIWLGTFPTPEMAAAAYDVAALALKGIDMAEAMMMSPPRINSSTWEDSRGDPSYIESLWSY	115
12	Niben101Scf04131g01007.1	NBERF12	MVYYFACRKTRIWLGTFETAEDAARAYDEASRLMCGQRARTNFPYNQNMPQTSSSKLLSATLTAKLHKCYMASLQMPKTSAQHKIKSSHVNVPKNAPIQENVAYEMKQQMVAPKQISIDT	120
13	Niben101Ctg04506g00002.1	NBERF13	KRPWGKYAAEIRDSTRNGIRVWLGTFDTVEEAALAYDQAAFSMRGPLAFLNFPMEKVKESLQNINMNSIQLLDGLSPAAALKETHKMRMKNVKRRRNRKKKKAVLVFEDLGADLLEELLMS	121
14	Niben101Scf07761g00005.1	NBERF14	MDEEPRHGRKMDTKNSGSGGEIKYRGVRRRPWGKFAAEIRDSARQGARVWLGTYNTAEDAARAYDRAAYSMRGHLAILNFPEEYNLPCSSSHFYTGSSSSREVLEFECLDDKLLEELLDCDEQNKSK	127
15	Niben101Scf01956g10015.1	NBERF15	MDERGKIKDNTEEVKYRGVRKRPWGKFAAEIRDTSRQGGVRIWLGTFTTAEEAARAYDKAAYSMRGNLAILNFPEEYNLPSSSSHFNTGSSSMASSSVQVRNEQVLELEYLDDKLLEELLDCDQHANKKK	130
16	Niben101Scf03930g01015.1	NBERF16	LSDSVSPLTPSMVQAKKFRGVRQRHWGSWVAEIRHPLLKRRVWLGTFETAEKAARAYDEAAVLMCGRNAKTNFPVAAPNENGKDTNTNIVNSAKLRKCCKSPSPSLTCLRLDTESSSIGVWQKRAGARPDSSW	133
17	Niben101Scf06865g00004.1	NBERF17	MNQPISTELFPATFPVYRRNSSFSCLIPCLTETWGELPLKVDDSEDMLREEETVVSPAETTAAPATESPRGRHYRGVRRRPWGKFAAEIRDPAKNGARVWLGTYETDEEAAIAYDKAAYRMRGSKAHLNFPHRIG	135
18	Niben101Scf07105g04007.1	NBERF18	MNQDNSNDNKESREEVRYRGVRKRPWGKYAAEIRDTNKNGVRVWLGTYATAEEAARAYDKAAFEMRGRFAVLNFPHEYPSFSSSSCPLSSSSSCSSSYSSVQNVNEVKEVIEFEYLDDNLLEELLGLESDKNQFK	135
19	Niben101Scf17204g01003.1	NBERF19	MDSNEDQKGRRENKYRGIRRRPWGKYAAEIRDPNRNGARLWLGTFETAEEAARAYDRAAFSLRGHQAILNFSNDGHYHHNNSTNVPLGPRPSYTSSMGNAHMSVSSYLPSSYSATGSSDQQENVRLEGHDHEEKGY	136
20	Niben101Scf03223g00002.1	NBERF20	MEGGSCCSRQNRQQDKPYRGIRKRKWGKWVAEIREPNKRIWLGSYSSPLAAARAYDTAAFHLRGPSAKLNFPQFIVNNENHQLHNQLSASDIRKKATQVGAKVNAMLQIATSSTESSWLSMKPDLNEYPTPETWEELAI	139
21	Niben101Scf04860g02011.1	NBERF21	MINRLLSPDTDITSRKKFRGVRQRPWGRWAAEIWDPTRGKQVWLGTYDTPEEAITVYDEVVVKLKGPDAVTNFPKVLMADITETESVTDGGEKRENDVALLPTSVLRNDYFTPFHNLQFCEVDAFGFDVDSLFRLPIFGMS	141
22	Niben101Scf07761g00004.1	NBERF22	MEGNSSRGKKALQEKESSNNKGKEEVKYRGVRRRPWGKFAAEIRDPTKPGSRQWLGTFDTAEEAARAYDRAAFNLRGHLATLNFPNEYYNQLQYPPLYYRNSISSPTNVVSNPRGRLENGNSSSSTGKAKEIIELECLDNRAEL	144
23	Niben101Scf01956g12014.1	NBERF23	MEGSSSKGKKVMQEKESGNKGKEEIKYRGVRRRPWGKFAAEIRDPTRQGARQWLGTFETAEDAARAYDKTAFNLRGHLATLNFPNEYYSQLSNPPYHYRTTSFNIINPIRRGLEKESSPIGNQDKEIIEFEYLDDTRFVPTNAITSKK	148
24	Niben101Scf15963g01004.1	NBERF24	MSSSDEGGSSTSAQQKKYRGIRRRKWGKWVSEIRVPGSSERLWLGTYTTPEAAAFAHDIAYYCLRESSSLDKLNFPFMLPVNVERGMSPRSVQKVASDAGMAIDAKLVTGYPTVKGGQQEMNIGHVCQNVDNHGQSEALSISVEDYLY	148
25	Niben101Scf19091g00016.1	NBERF25	MENIIPQLHVRNLGRRSSRHSTKYHGVRRRPWGRYAAEIRNPNTKQRHWLGTFDTAEEAALAYDISSIAFCGIENARTNFVYPFMSFPSPSSQQPPSPPPPPPPPPPSTPELEVVENEEDDNDNDDESLVIASILQSFRHSNTLDKLAL	149
26	Niben101Scf01956g12018.1	NBERF26	MNSSSLNLLYHLNFNTFSLPFNVNDSDEMLLYGLLAQETTSRDGSRVVAAGSRNSNNYEDSISEPKPLKERIYRGVRRRPWGKFAAEIRDSTRNGIRVWLGTFDSAEAAALAYDQAAFLTRGSGAILNFPVERVVESLNGMKCYVEEAYFM	151
27	Niben101Scf00603g02001.1	NBERF27	MEKRQPPPSPAENRRKIDDQRGRRSTRHPVYCGVRRRRWGKWVSEIREPRKQSRIWLGSFSSPEMAARAYDVAAYCLKGCNAQLNFPDEIEQLPRPITSTARDIQAAAAMAANNAIIMKKKNQENCGSDDFWEEIELPDLKDGNDYNLYSEE	152
28	Niben101Scf01177g04031.1	NBERF28	MVYPLEESALDLIRQHLLADFAFGESYSSSEPNTSFDSMPYLNSFKFEAKAPRISSNSWKFSSKPEDSVQKMENTLQKKRYRGVRQRPCGNFGAEICDPTRKGQRIWLGTYETETEAAMAYDRAALKLRGSRAILNFPQKIDDGDIICFMDL	152
29	Niben101Scf01695g01005.1	NBERF29	MWITNCAIDSQAIIILLSSDTDVTRRKKLRGVRQRPWGRWAEEIRDPPRGKRVWLGTYDIPEEATTIYDEAAVKLTGPNAVTNFLKVLTADITETDSVNNGWEKSENDVVLSPTSVLRNDYFTPFDNLWFCEVDAFGFEVDSLFRLPVFGMS	152
30	Niben101Scf03314g00004.1	NBERF30	MMEGEKRKQRQHQQDKPYRGIRMRKWGKWVAEIREPNKRSRIWLGSYSSPVAAARAYDTAVFYLRGPTARLNFPECIVNDDRELHDLSAASIRKKATEVGARVDALQTAALHNNSSAGFTESNSNSNINPRRVTIKPDLNEYPSPESCDEDN	152
31	Niben101Scf00941g00007.1	NBERF31	MENILPQLHVRNLGRRSSRHSTKYHGVRRRPWGRYAAEIRNPNTRQRHWLGTFDTAEEAALAYDISSIAFCGIKNARTNFVYPFMSFSSSSSQPPPPPPPPPPPPLLSTPELEVIENEEDDNDNDNDNDDDESLVIASILQSFRHSNTLDKLAL	154
32	Niben101Scf02397g00007.1	NBERF32	MWLGTFDTVEEAAQAYDEAACLLRGSNTRTNFYNHSPVNPALSTKIRNLLNQKKSLNKINSKNSTTTIAAAATATITSCTSSLSVSNSFSSNTDTSGSRSHQENQIFGDAYKPDLSFFMAGFDQMGSSNFDHSSTFSTDFDKILLDEKVGAKRRGC	156
33	Niben101Scf06444g02001.1	NBERF33	MVSMMEGEKRKQRQHQQDKPYRGIRMRKWGKWVAEIREPNKRSRIWLGSYSSPVAAARAYDTAVFYLRGPTARLNFPECIVNDDRELHDLSAASIRKKATEVGARVDALQTAAALHNNSSAGSTESNSNSHINPGRVTIKPDLNEYPSPESCEEDN	156
34	Niben101Scf02744g00004.1	NBERF34	MVRPKGNQEKKDNGDRYKGVRMRKWGKWVAEVRQPKSRDRIWLGSYDTAEEAARAYDAAVVCLRGPSATINFPNNPPLIPSSGPNCDQQQLSPSQIQVAASRHARRICESAVGTVFFKDNNNSEFGCSYVDCYNLATTDKTSTGDGEVLHDDLFDSA	157
35	Niben101Scf05692g06003.1	NBERF35	MRRARAAAAPAPVTGEPNGSGGSKEIRFRGVRKRPWGRFAAEIRDPWKKTRRPTSSSMSSTVESFSGPRPPPAPRKQTTAFSRKYPLSPPVVPDDCHSDCDSSSSVVDHGDCKKENDNDNDNIASSSFRKPFLFDLNLPPPMDYAGADDLHCTELCL	157
36	Niben101Scf06951g00004.1	NBERF36	MPLTSRHNLPSKQNLKLALVRRECIISPHLRLRRRQRKKTERYRGVRQRPWGKFAAEIRDPAKNGARVWLGTYEMAEDAALAYDKAAYRIRGSRALLNFPLRVNSGEPEPVRVGSKRSSILPESSSSSSSENVSTKRTKKKFVLLRRIEEFVQCIKFFV	159
37	Niben101Scf05173g07005.1	NBERF37	MDENIEETTNLEFQSEPKEQTKGGNAVREGNTKQNWRRYIGVRRRPWGKFAAEIRDPERRGARLWLGTYETPEDAALAYDQAAFKIRGSRARLNFPLLIGSNMPEPARVKGRRQNSRSLEPSSSSSTTSSENGTRKRNIDVINSIAKAKLVGHICNLEMSL	161
38	Niben101Scf05173g08003.1	NBERF38	MKTEETIPHLEEKSESEEETKGHVVAREKSAAQDWRRYIGVRRRPWGKFAAEIRDPERKGVRLWLGTYETPEDAALAYDQAAFKIRGSRARLNFPHLIGSNTPKPARVTTRHSRRRSPEPSSSSCTPSSEKGTRKRKVDLINSIAKAKFIRHSCSNLQMLL	161
39	Niben101Scf18347g00023.1	NBERF39	MRVWLGTYDTAEAAAYAYDRAAYKLRGEYARLNFPNIRDPSKLGFGDSEKMNAVKNAVDAKIQAICQKVKREKAKKGAKKKSENESKVKETMDSSSSTSSLVGDVISPSVSEDGLWKSENSNCSIFGDCLKEPLMESEFDSCSLARMPSFDPELIWEVLAN	161
40	Niben101Scf11341g00009.1	NBERF40	MESSKSPSSKNIQEKQVRKRKSKLISSNDGKKFIGVRQRPSGRWVAEIKDSSQKLRLWLGTFDRAEEAALAYDNAARLLRGRNAKTNFKYQGILKPNEENCSLLGKNPRLYQLLKLAIMKKLAGNTYQNEIETETFVQENMGCDQYKEEISRIQLQGSSSKE	162
41	Niben101Ctg16023g00001.1	NBERF41	METMDSSSLNLLYHLNFNTSSLPFNVNDPDEMLLYGLLAQETTSRDGSGVLVAGSRDSSNYKKVLSLVSEPKPSKERTYRGVRRRPWGKFTAEIRDSTGNGIRIWLGTFDSAEDAALAYDQAAFSSRGWGNFELSGGTNSSPLNGSYMTQIHINRISKFRISN	163
42	Niben101Scf03657g02001.1	NBERF42	MYRVVRKQPWGRFAAEVQDPIKKARVWLGTFDTAEDVARAYDDAARAFHGAKAKTNFLVFPPYGQNQFENFNRPASSSLSSTGESSSGARDFHSRVELTSRITPSAVECYSDCDSSSTVVDDNIDGDSSAFCKRPLPFDLNLLPPSDDVDDVHVTPCVFSYFN	163
43	Niben101Scf01008g00004.1	NBERF43	MAATREGHYRGVRKRPWGRYAAEIRDPWKKTRVWLGTFDTPEEAALAYDGAARSLRGAKARTNFPAAPPLPFDLNLNPSADHHHRLTSSSSPSARRLMNIGEFLQVGHPVLKDVVGPPPPPVFSLPVSGVAPAKESDAAAAAKYFGIVRRGLPIDLNEPPPLWM	164
44	Niben101Scf05480g00003.1	NBERF44	MAATREGHYRGVRKRPWGRYAAEIRDPWKKTRVWLGTFDTPEEAALAYDGAARSLRGAKARTNFPAAPPLPFDLNLNPLADHHHRLTSSSSSSARRLMNIGEFLQVGHPVLKDVVGPPPPPVFNLPVSGVVPAKENESGAASKYFGIVRRGLPIDLNEPPPLWM	164
45	Niben101Scf00163g22003.1	NBERF45	MAASSPQENCTSLDIIRQHLLDDNGFMEHYYCPETTTLYSQSSSPSESVDQSFSFEPTLNYADTAQSSNLDISSFFNNSKTEFETKPNVSAGCIISQIREKKHYRGVRQRPWGTYAADQIRDPNRWGTRVWLGTFDTAIEAARGGRTLTQAVSWSENFTKLTDMQR	166
46	Niben101Scf09004g00003.1	NBERF46	MDSKEEHQQNEAIEKPSKSTNQAGESSAILPPLVRMHEEEEKAEGEKSERHEKASEKAIIIQNEETEVISKEKTKEKKLMQRNANKYKGVRQRKWGKWVAEVRDTRKKNRIWLGTFDTAEEAALAYDKAVIEMRGVDAITNILKPPPKEINFINPPPSSSEDDARV	166
47	Niben101Scf36372g00002.1	NBERF47	MDLKIQDHEKLISIKVEVESLSLQTDDSISKEEKHYIGVRKRPWGKFAAEIRDSTRNGRRVWLGTFDTAEEAAMTYDQAAFCMRGPSTCLNFQVEKVRESLQKMECNNLNDGLLSPAAALKEKHKKRNSSSSRKKQVNSIKEVNVFIFEDLGPDLLDELLSEYSSCSN	168
48	Niben101Scf06413g01001.1	NBERF48	MDLKIQDHEKLISIKVEVESLSLQTNDSISKEEKHYIGVRKRPWGKFAAEIRDSTRNGRRVWLGTFDTAEEAAMTYDQAAFCMRGPSTCLNFPVEKVRESLQKMECNNLNDGLLSPAAALKEKHKKRNSSSSRKKLVNSIKEEENVFIFEDLGPDLLDELLSEYSSCSN	169
49	Niben101Scf07066g03005.1	NBERF49	MEMGGGGQSGGVASSGVCCGAKRKNERPYKGIRMRKWGKWVAEIREPNKRSRIWLGSYSTPVAAARAYDTAVYYLRGPSARLNFPELLGGDGGLNDLSAASIRKKAIEVGAQVDAIQNSLATHHGHDHREEKVHCETASPSELKPCWFQEKPDLNKKPEPEDPEQDYCG	169
50	Niben101Scf08249g02004.1	NBERF50	MENVLFTCSRMEVRNRSNGHGNQALGVEGLIKIDNVSIDDFPEFKTNSDTNLSPTSDSRVSSNSTISSDTTSSNNNENKERNYRGVRRRPWGKFAAEIRDPNRKGSRIWLGTFDADVDAARAYDCAAFKMRGRKAILNFPMDAGKSGAPANIGRKRRRDNGIQLEMLINL	170
51	Niben101Scf08651g04017.1	NBERF51	MVRPKGNKEKKDNGDRYKGVRMRKWGKWVAEVRQPKSRDRIWLGSYGTAEEAARAYDAAVVCLRGPSATINFPNDPPLIPSSAPNCDQPQLSPSQIQVAASRHARRVCESAVVDSRLPTVETVFFRDNNNSEFGCSSYVDCYNLATTDKTSTGDGEILHDDLFDSARMWTF	171
52	Niben101Scf01795g06002.1	NBERF52	MLLLNVLSEVGENSSNNLHANKQEMTHLKENEGANYRGVRRRPWGKYAAEIRDSTRNGVRVWLGTFDTAEEAALAYDQAAFALHGTMAVLNFPVDIVYQSLMEMECGFKEGCSPVLILKKMHSMKKGKSNMNRKKKEKEMNFENVLVLEDLGADYLEEILRLSEGCCDPSMSC	173
53	Niben101Scf05135g06001.1	NBERF53	MEVGGGGQSGGVASSGGCCGAKRKNERPYKGIRMRKWGKWVAEIREPNKRSRIWLGSYSTPVAAAWAYDTAVYYLRGPSARLNFPELLGGDGGLNDLSAASIRKKAIEVGGQVDAIQNSLATHHDHGHDHDHPEVKVHCETASPSELKPCWFQEKPDLNKKPEPEDPEQDYCG	173
54	Niben101Scf06328g00004.1	NBERF54	MLLLNVLSEAGENSSNNNLHVNKHGTNFKENKGANYRGVRRRPWGKYAAEIRDSTRNSVRVWLGTFDTAEKAALAYDQAAFALHGTMGVLNFPVDIVYRSLMEMECRFEEGCSPVLILKKMHSMKKGKSNMNKKKKEKEMNFENVLVLEDLGADYLEEILRLSEGCCDPSTSC	173
55	Niben101Scf05800g00005.1	NBERF55	MARPQHRYRGVRQRHWGSWVSEIRHPLLKTRIWLGTFETAEDAARAYDEAARLMCGQRARTNFPYNPNIPQTSSSKILSANLTAKLHKCYMASLQMAKTSAQQQKIQPKNVPIQENVVYEMKQQMVVPKPSVLTHDVESIPQVVKPLEDDHIEQMIEELLDYGSIELCSNVTSQ	174
56	Niben101Scf01692g03007.1	NBERF56	MEGDGGRSGGAAVVGGGGGCCSGKIKKERIYKGIRMRKWGKWVAEIREPNKRSRIWLGSYSTPVAAARAYDTAVYYLRGPSARLNFPELLVGDGGLSDLSAASIRKKAVEVGARVDAIQNSLAIHKLDHDHDQQRPRESRNHCCENGSPAKLKLCWFQEKPDLNLKPEPEDPELEY	176
57	Niben101Scf02182g21007.1	NBERF57	MEENNNTSKPSRRGGVTSPYRGVRKRKWGKWVSEIREPGKKTRIWLGSFDTPELAVAAYDSAALHLKGHAAKLNFPELVEFLPKPSSCSPDDIRFAAQEAALKVKRNSEQIASSSATNNLAPVTIGLSPSHIQAINDFPMDSPKMWSDVTREYVGEETMFTCNDYEMISTTGPFYL	176
58	Niben101Scf01001g06011.1	NBERF58	MASQQEHQKKEAVEKPPEIDAVEKSNSQVGESSGALPHLVRIHVTDRDATDSSSDEEKAGGEKSEQHGKTCVKEIIIENGKTEVIPKKKPKEKKDIMVLQGDVKKYRGVRQRKWGKWAAEIRDARRKTRLWLGTFDTAEEAALAYDKAAIEIRGANTFTNILKPPPREMLQTDDARV	177
59	Niben101Scf04826g01005.1	NBERF59	MEVDGGRSGGAPVVGGGGGCCSGKIKKERIYKGIRMRKWGKWVAEIREPNKRSRIWLGSYSTPVAAARAYDTAVYYLRGPSARLNFPELLVGDGGLSDLSAASIRKKAVEVGARVDAIQNSLAIHKHDHDHDQHRPRESRNHCCENGSPAQLKPCWFQEKPDLNVKPEPEDPELEYW	177
60	Niben101Scf02182g19004.1	NBERF60	MEDPQEKSNIHMYRGVRKRKWGKWVSEIREPGKKTRIWLGSYETPEMAAAAYDVAAFHLKGERARLNFPELIHSFPKPSSSKPEDVQMSAHEAAMRFKRQTPEPPEGGGCGGGGTVVPVRVGLSSSQIQAINESPLDSPKMWMELAGALLLRDPVREYTCPSYSFTDPMVLCEDIAEK	178
61	Niben101Scf01142g04009.1	NBERF61	MSRPQQRYRGVRQRHWGSWVSEIRHPLLKTRIWLGTFETAEDAARAYDEAARLMCGPRARTNFPYNDNDSQSSSTKYLSSALIAKLQRCQMKSLNMGKRPGMTKLEVQDRQLYAPVNRGDNGIGRRNGQMSVDMTTNRVDYEADSSTEEFKTLEDHHIEQMIEELLDYGSMELCSVLQN	179
62	Niben101Scf04131g01028.1	NBERF62	MARPQQRYRGVRQRHWGSWVSEIRHPLLKTRIWLGTFETAEDAARAYDEASRLMCGQRARTNFPYNQNMPQTSSSKLLSATLTAKLHKCYMASLQMPKTSAQHKIKSSHVNVPKNAPIQDNVAYEMKQQMVAPKPSVLTHDVESIPLFVKPLEDDHIEQMIEELLDYGSIELCSNVTSH	179
63	Niben101Scf06190g06004.1	NBERF63	MSRPQQRYRGVRQRHWGSWVSEIRHPLLKTRIWLGTFETAEDAARAYDEAATLMCGPRARRNFPYNDINDSQSSSTKYLSSALIAKLQRCQMKSLNMGKRTATTRLEVQENQLYAPVNRGDNGIGRRHGQMSVDMTTNRVAYEADSSTQEFKTLEDHHIEQMIEELLDYGSIELCSVLQD	180
64	Niben101Scf06848g09002.1	NBERF64	MEDNNNTSKSSRRGGVTSPYRGVRKRKWGKWVSEIREPGKKTRIWLGSFDTPEMAAAAYDSAALHLRGHAAKLNFPELVDFLPKPTSCSPDDIRFAAQEAALKVKRNSEEMASSSATNNLAPVTIGLSPTQIQAINDFPMDSPKMWSDVTREYVGEETMFTCNDYEMSDYEEMDDCLWDS	180
65	Niben101Scf36703g00001.1	NBERF65	MLTKDKQSEEVGRGGEISESDIAEMVSTPNNSFNNSSTGVVFSSNSNSNSLFNITNSDFISTPTSSPHPDWNFLSFDDSTRLTALLNDGPENVSCTYKGVDFISTPTSDSNLSLDVTTSLTTLSNSAPENARRIYRGVRQHPFGKWTAEIRGPNRAARIWHGTFDNSHDAAVAYDDAAYR	180
66	Niben101Scf01212g03005.1	NBERF66	MVPTPQTDLPLDENDSQEMILYEVLHEANAINIPYLPQRNQLLPKTVLRPSQVMGKKYRGVRQRPWGKYAAEIRDSARHGARVWLGTFETAQEAALAYDRAAFRMRGAKALLNFPSEVVTASTSVDRLLLRPPSLSSDSYTNSNHSNSSSNEVSSGKINAFESRISTEDIKTEYMENFLAH	181
67	Niben101Scf00177g02016.1	NBERF67	MAESVDTNNSLIGKKSTVGRSRKGCMRGKGGPENALCTYRGVRQRTWGKWVAEIREPNRGARIWLGTFNTSLEAAQAYDDAARRLYGSGAKLNLSETQNSSNENFNSGKKIIIDGDNGNESSGECSVLEEASIFKDGNGKYLVWETPAPSLLDGQLSTGFNWNSTNEDDTNFSFEEKEFNEKVN	184
68	Niben101Scf01094g03014.1	NBERF68	MIPAPQSDLPLNENDSQEMILYEVLHEANALNIPYLPQRNQLLPRNVLRPSQVIGKKYRGVRRRPWGKYAAEIRDSTRHGARVWLGTFETAEEAALAYDRAAFRMRGAKALLNFPSEVVTASASVDRLLLRPPSLSSDSYINSHHSNSSSNEVSSGKINAFESRISTEFSQDIKTEYMENFLAL	184
69	Niben101Ctg12291g00001.1	NBERF69	MVQAKKFRGVRQRHWGSWVAEIRHPLLKRRVWLGTFETAEKAARAYDEAAVLMCGRNAKTNFPVAAPNENGKDTNTNIVNSAKLRKCCKSPSPSLTCLRLDTESSSIGVWQKRAGARPDSSWVMTVELGKKKINDNEPTLEGEQEKDTVTASIPETSMEKLEGEERGMDEEEQMALQMIEELLNRN	186
70	Niben101Scf02483g02007.1	NBERF70	MQRSTKKVKQEETASINHQISQPKFTDEQEFSIMVSALKNVITGDTTQEFQYIISSSSPSTCMSSLEPPLFRVPTEPEPCQFCKIIGCLGCNYFGASVAADDDNKKTNIIVKKKKKNYRGVRQRPWGKWAAEIRDPRRAARVWLGTFNTAEDAARAYDKAAIEFRVKDCPCKVATTVDFYSVMSAA	186
71	Niben101Scf03245g04005.1	NBERF71	MLASNYPKKHAGRKKFRETRHPVYRGTRRRNSNKSVCEVREPNKKSRIWLGTFPTAEMAARAHDVAAIALKGRSACLNFADSAWRLPIPASATAKYIQKAAAEATEAFRPLESDRENSREIIDNQVIQGAIAELPDNVLFLDEEALFYMPGLLASMAEGPMLPPPQCIIDGYGMESDHADMSLWSY	186
72	Niben101Scf03245g06003.1	NBERF72	MWSNHCPTNSSTAISNRSEQGRHSVYRGIRKRNGKWVSEIREPRKTTRIWLGTYPTPEMAAAAYDVAALALKGHDTPLNFPDSMCSYTMPTSLTAADIRAAAAHAAAVRAPQLESEGARHQAECQPEAGDEGAMGQDFFDEEEVFGMPRLLVDMAEAMLVSPPRMKTMPSDELPEYFDASYTLWSYP	187
73	Niben101Scf02543g00002.1	NBERF73	MPRRKNSETNRSTSVAFRHPKTDQNRYRGVRKRPWGRFAAEIRDPIKKARVWLGTFDTAEDAARAYDDAASAFHGPKAKTNFSVLPPYGQNRFENFNPPASSNLSSTVESSSGVRGLHSRVEITRRITPPAVECYSGCDSSSTVVDDNIDGDSSSFCKQPLPFDLNLLPPSDDVDDVHVTPCIFSYVN	188
74	Niben101Scf08597g01023.1	NBERF74	MPRWKNSETNRSTSVAFRHPKTDLKRYRGVRKQPWGRFAAEIRDPIKKTRVWLGTFDTAEDAARAYDDAARAFHGPKAKTNFSVFPPYGQNQFENFNRPASSSLSSTGESSSGARDFHSRVELTRRITPSAVECYSGCDSSSTVVDDNIDGDSSAFCKQPLPFDLNLLPPSDDVDDVHVTPCIFSYFN	188
75	Niben101Scf13455g01002.1	NBERF75	MDVKIQDEKQASNICVAEEVEVESSSLEDTSSSETSSKEKKNDFSPKRPQKAEKRYIGVRTRPWGKFAAEIRDSTRNGIRVWLGTFNSAEEAAMAYDQVALSMRGPSTCLNFPVERVRKILQETECNFLKNGLSPAAALKEKHKKRTTVSRKKGKRKQVNEEDNIVFIFEDLGTDLLDELLSEYSSSN	188
76	Niben101Scf00784g01003.1	NBERF76	MSSPGASSSGGSSGRHPVYKGIRRRKSSGKWVSEIREPRSPNRIWLGTFPTPEMAAIAYDVAALALKGRDAELNFPNSASSLPVPTTNSPRDIQAAAACAAAALGAAGDTLGARRGVDNNNNRPVSREVENSTPWNNNEFMDEDLIFDMPNVIMNMAEGMLLSPPRFNVPDDDTTAAEYIADQDLWNYP	189
77	Niben101Scf06413g01002.1	NBERF77	MEHVKNQYEKQTSNVAEEVKVKVKVEAESSIETNSSKERQTNDEEVNFNPRNPQKYIGVRKRPWGKYAAEIRDSTRNGIRVWLGTFDTAEEAAVAYDQAAFSMRGAQTCLNFSVEKVRESIQKMECNNLNDGLLSPAAALKEKHKKRNSSSSRKKQVNIKEEENVLIFEDLGPDLLDELLSSEKSSCSNY	190
78	Niben101Scf08965g00003.1	NBERF78	MEHLKNQYQEQTSNVSIVDEVKVKIEAESSIETISSIERETNDEEVNFNPRNPQKYIGVRKRPWGKYAAEIRDSTRNAIRVWLGTFDNAEEAAMAYDQAAFSMRGAQTCLNFPVEKVRESLQKMECNNLNDGLLSPAAALKEKHKKRNSSSSRKKQVNIKEQENVLIFEDLGPDLLDELLSSENSSCSIY	190
79	Niben101Scf12874g00001.1	NBERF79	MTPPEEADTIYDEAVVKLKGPGAITKFPKVLMADITETESVTNGGEKSENDVALSPILFSPDTDVTRRKKFRGVRQRPWGCCAAVIRDPTQGKRVWLGTYDTPEEAATIYDEAAVKLKGPDAVTKFLKVLMADITKTESVSNGGEKSENVVALSPMSVLHNDYFTLFDDLRFCEVDAFGFDVDSLFRLPA	190
80	Niben101Scf07913g00005.1	NBERF80	MVHSKKFRGVRQRHWGSWVSEIRHPLLKKRVWLGTFDTAEEAARAYDQAAILMSGRTAKTNFPITDDSDNKELKAKDQEFSSIPSPKALSEILHAKLRKCSKNSHIGVWQKRAGPSDSKWIMTVELQKKNNVNAAIEAELNSSSTSSSSKNCGEIVEGISIRSEMDEEERVALQMIEELLHINGPCPTFDI	191
81	Niben101Scf06848g08006.1	NBERF81	MEDHQQSSNIHTYRGVRKRKWGKWVSEIREPGKKTRIWLGSYETPEMAAAAYDVAAFHLKGERARLNFPELIDSFPKPSSSKPEDVQMAAHEAAMRFKRQTPEPPESGGCGGGGTVVPVRVGLSSSQIQAINESPLDSPKMWMELAGALLLRDPVREYTYPSYSFTDPMVLCEDIAEFGEWDEMQQNHDSIWNF	194
82	Niben101Scf10438g00009.1	NBERF82	MIDDDETNIRTMVWLGTFDTAEDAARAYDEAALKFRGSKAKLNFPENIKLLPTSSTHEQSPLKLYPHQNIVGNLGLPTSTFPTDFVENTRVSYFSNDYPIIHTQPNYYNNTNISPQIFLNDDFQRLRPPSSLLNQFQNSSSSSSSSLSSSSSSSQLPFLPRMFFQGSQPTQSSGNDFRATLSDSTYDHPSSSSR	194
83	Niben101Scf09004g00001.1	NBERF83	MTVSRELIRSKPRICYAWMASQQEHQKKEAVEKPPEIDVVEKFNNQVGESSGALPHTVRIHVTDRDATDSSSDEEKAGGEKSEQHGKTCVKEIIIENGKPEVTPKKKSKEKKDITVLQGDVKKYRGVRQRKWGKWAAEIRDARRKTRLWLGTFDTAEEAALAYDKAAIEIRGANTFTNILKPPPREMLQTDDARV	195
84	Niben101Scf00085g00008.1	NBERF84	MDFEDDQTSNSSCSSSDQDILDKEKNFNLSPCSTNVIKPLLHNKRRTGRKKFKETRHSFYRGVRRRNGDKWVCEIREPNKKSRIWLGTFSTPEIAARAHDVAALALRGTKASLNFPESSWSLPKAQSSFPRDIQIAALPIKNTNNDQENSIKGYSDSCELMEFVDEEAMFNMPILIDSMAEGMLITPPAMKRGFNW	196
85	Niben101Scf11954g01002.1	NBERF85	MATYGGGSSTKIRGSNTASDSYCGRHPVYRGIRRRKSSGKWVSEIREPRSTNRIWLGTFPTAEMAAVAYDVAAIALKGPDTDLNFPNSAASSPVPATSSPRDIQAAAASAAAAVGAAGDALLARREVHDQKSKLVAENLGFENNYEFMDEDLIFDMPNVLVNMAEGMLLSPPRFNLPDDDIAAAAEYTAYQNLWNYP	197
86	Niben101Ctg14204g00003.1	NBERF86	MNIIKSSTSSSANKSTKPRKNIGSNVCSTQNGKQNAEEQQNNYRYLGVRRRPWGRYAAEIRDPNTKERHWLGTFDTAEEAALAYDRAARSMRSNNNKSNKPIRTNFVYSDMPHGSSVTCMISPDEEYHHQFQLHQQQLLIFDQADQNAAHTVNYTDFSHFSINNISNISNDGGGGEYFALQQYYNSNNDVHMEDGYRY	198
87	Niben101Scf03580g01003.1	NBERF87	MATYGGSSTTIGGSNSVTVPHSYSGRHPVYRGIRRRKSSGKWVSEIREPRSPNRIWLGTFPTAEMAAVAYDVAAIALKGPDTDLNFPNSAASLPVPATSSPRDIQAAATSAAAAVGAAGDALLARREVHDQKSKLVFENLGFENNYEFMDEDLIFDMPNVLVNMAEGMLLSPPRFNLPDDDIAAAAEYTASQNLWNYP	198
88	Niben101Scf04437g00010.1	NBERF88	MARPQQRYRGVRQRHWGSWVSEIRHPLLKTRIWLGTFETAEDAARAYDEAARLMCGPRARTNFPYNPNMPQTSSSKLLSATLTAKLHKCYMASLQMAKNSAQEQQQQQPRKIQTSYAQTAAANVGNHVAYETKPQMLMSKPTFLAQQQEGANWGVMKVEAVEHTPQFINTLEDDDIEQMIEELLDYGSIELCSVVSHQ	198
89	Niben101Scf01767g03004.1	NBERF89	MRHRKSSELNRPGSHLLNQPETDPPRYRGVRKRPWGRFAAEIRDPIKKTRVWLGTFDTAEDAARAYDDAARALRGPKAKTNFPNLGAITTQQDNSPYGSNQFELFPNSRPASSSMSSTLESSSGPRGSGNKLTRMKIPRPVLPPEDCRSDCDSSSSVVDDRCDADQTSSFLLKQPLPFDLNLPPPSDDVDADDLHVTAL	199
90	Niben101Scf04217g07002.1	NBERF90	MADHFCNITPSDNPPPSENFSPTGSASGNVLSPRRHPNFRGIRQRNGKWVSEIREPRKTTRIWLGTFSTPEMAAAAYDVAALALKGPDVPLNFPDSAYSYPIPASLSATDIRAAATNAAAARAPPISESNSHEVLAEPGNYEGASTTVAATFVDEEEIFGMPKLLDEMAEAMLVSPPRMHQSTSYDESPENSDADSLWSYP	201
91	Niben101Scf12483g01009.1	NBERF91	MRHRKPSEVNRPGSDLLKQPETDPPRYRGVRKRPWGRFAAEIRDPIKKTRVWLGTFDRAEDAARAYDDAARALRGPKAKTNFPNLAAITTEQDNNPYGSNQFELFRNSRPASSSMSSTLESSSGPRGSGNKLTWTKIPRPVLPPEDCRSDCDSSSSVVDDRCDINQMSSFLPKQPLPFDLNLPPPSDDVDADDLHVTALCL	201
92	Niben101Scf34675g00005.1	NBERF92	MMLNKSGQASLFNDETVQRSKARHWGKWVDEIRLPRKRTRLWLGTFDTAEDAAMAYDREAYKLRGENANLNFPELFLSKHNIAISSSPTTSHESALPNLEMQLAPLPPSECGNFEGEMGSSEVIAIDGVQGNVENCGALSQLSYFEAWLNAIPEGWGPGSPVWNDLDTNNNLILPHTNNFGDVLQQTPHNSDLQGTTKPLG	201
93	Niben101Ctg13994g00001.1	NBERF93	MDQQTMLSSRVKYTEHRKQTTMVKPSVPATVTGRRKCPEMNAANVGPRVVRITVTDADATDSSSDEGEGLYGRHRVKKFVNEVRIEPCMGETVKSNGSDNGSVSGVLRNGSSESGIAPKRRKKNAGATKAEATAARGLKANNVKKFRGVRQRPWGKWAAEIRDPLRRVRLWLGTYDTAEEAAMVYDHAAIQLRGPDALTNFA	202
94	Niben101Scf00454g02007.1	NBERF94	MTTPDEGLTLELIRHHLLEDFTSTELFINSLNSCFSDHISPVFTSVKTEPSTFNNSLSDSSTSYPNSPISHYFSDFPKFKTNSDTNLSPTSDSCVSSNLTISSDTNNNENKTKNYRGVRRRPWGKFAAEIRDPNKKGSRIWLGTFDTDVDAARAYDYAAFKMRGRKAILNFPMDAGKSGAPANVSRKRRRDNGIEHEMLINL	202
95	Niben101Scf00454g02008.1	NBERF95	MTTQKERLTLELIRHHLLEDFTSTESFINSLNSCFSDQISPVFTSVKTEPSTSNNSLSDSPTSYPNSPISHYFSDFPEFKTNSDTNLSPTSDSCVSSNLTISSDTNNNENKTKNYRGVRRRPWGKFAAEIRDPNKKGSRIWLGTFDTDVDAARAYDCAAFKMRGRKAILNFPIDDGKSGAPANIGRKRRRGNGIQHEILINL	202
96	Niben101Scf07926g07004.1	NBERF96	MARPQQRYRGVRQRHWGSWVSEIRHPLLKTRIWLGTFETAEDAARAYDEAARLMCGPRARNNFPYNPNMPQTSSSKLLSATLTAKLHKCYMASLQMAKNSAQEQQQQPPPRKIQTSYAQTAVANVGNHVPYETKPQMLMSKPTFLAQQQEAAAGVNWGVMKVEAVEHTPQFINTLEEDHIEQMIEELLDYGSIELCSVVSSHQ	203
97	Niben101Scf09882g01001.1	NBERF97	MVQAKKFRGVRQRHWGSWVAEIRHPLLKRRVWLGTFETAEEAARAYDEAAVLMSGRNAKTNFPVAAPNENGKDNNTNIVNSSFSGSSSSSSSLSAILSAKLRKCCKSPSPSLTCLRLDTESSSIGVWQKRAGARPDSSWVMTVELGKKKINDNEPTLEGEQEKDIVTASIPETSMEKFEGEERGMNEEERMALQMIEELLNRN	203
98	Niben101Scf07226g08005.1	NBERF98	MKISQATSRKGCMRGKGGPENASCTYKGVRQRTWGKWVAEIREPNRGPRLWLGTFETSHDAAMAYDAVAHKLYGDNAKLNFPHMKTKNQGQNSTGSSSSTYRTGVPETVEMENESLFFNNDFESSCYSGEQASFPLLDNKKVEEDNNDEGVAFGGMWEDLNVNLPEIDDSSIWAEAKATTLFQAVNEPGMFAGNLGDGIEYPPWYS	206
99	Niben101Scf08546g05005.1	NBERF99	MTTTRTEDEELTLELISQHLLGDFTSTESFVNSLSLDHDICFSTLPDCFQPVIFTSDQKHNHFNLDNNFSEFETKPNIIRSSTSFTTSVVSNSRIFDDSSLNRTDKKVDGSSYGSSVEENGKKKHYRGVRRRPWGKYAAEIRDPARKGSRVWLGTYETDVDAARAYDCAAFKMRGRKAILNFPFDAGNLSPPANIGRKRTKRIGHK	206
100	Niben101Scf01159g00002.1	NBERF100	MYQQTTISDSDLSVLENIKFHLLNDTDFSQIFSTFDQCFSNAKIINSPNSSFGSSPTEEISWGDMLTNMNSKSQRVDNLEHKEEAKESHVAARGVHAPQDWNRYRGVRRRPWGKFAAEIRNPDRKGARLWLGTYETPEDAALAYDQAAYKIRGSKARLNFPHLIGSNISEPVRVAPRRRCLSPEISSSSFSLSFVENVPLKKRKLAENRIRG	212
101	Niben101Scf03310g00003.1	NBERF101	MTESSSSQSESASSDSLPFYFLSNSFDFEADFFQFGNEVSNSSSESANSVHNSTSFIKLKTEPTISSSEIEKSQVIIDLTSPKLSNVGDWKPSLKIDLPPVKKFEWIGFGNSTTLSTSIVSVTMQQKVKTEEKRHYRGVRQRPWGKYAAEIRDPTRRGARVWLGTFHTAIEAAKAYDRAAFKMRGSKAILNFPLEVGKNLSYSSSSVDGGET	212
102	Niben101Scf05156g01011.1	NBERF102	MDKPQDLDGKKIKRNRDSSKHPVYRGVRMRNWGKWVSEIREPRKKSRIWLGTFPNPEMAARAHDVAALSIKGNSAILNFPELAASLPRPVTLSPRDIQAAAAKAAAMDKFDNNNVNSTTSSDDSSPNNSTSSSSNMSTSSSLSSLVSAIDLATSEELTQIIELPRLGTSYFDDELKNDLVYSDHSAVEGWLYPDDGGMIYSSCFEPSLLWNY	212
103	Niben101Scf10785g01002.1	NBERF103	MNTIKSSTSSSTNKSTKPRKNIGSTVSSNGKQNAEEQQNNCRYLGVRRRPWGRYAAEIRDPNTKERHWLGTFDTAEEAALAYDRAARSMRRNNNKSNKPTQLPPLPDDITSSGNFNYYSEESNHQATQFPAISSVSDQMIMPMSFGTNDEYQYGMTCGELGGGGSTITTTSGTTTESYNGFGFDDCLQPLQYCSSNIMQDESNNTTLGYWFS	212
104	Niben101Scf06621g02032.1	NBERF104	MHICEGNSRRKRYRGVRQRPWGKWAAEIRDPKKAARVWLGTFETAEAAAVAYDEAALRFKGNKAKLNFPEKVQGKFQYLTTTITSQDHHSPNNIVQQQYIPITNSNNNHPLPFQEHYPSLHHYAQLLQNDSNTTDLNFGTTPSYYQQSSGSGSFDFAQSSSNSTLSELPASKLQSSYKQEEEVFMRFPSHFDTSSSSCGPHESNWEEFEDRKS	213
105	Niben101Scf00753g02005.1	NBERF105	MKSQPKFAEENNEKQQREDEQIKIQRKIIIKISDPDATESSSSEEEEQEKRQSRKQQPKLTVHEIFQDKVNTTTFSSKLPSGVRKRKWGKYCAEIRDPFNKKRIWLGTFNTAEEASQVHQSKKLEFEGKLKMAKIAKTKKTISENSELETQTSDSSNGVEELLMGQWIQISDDKEVYFSLKLGVPIVDNYGFLLGEFSELDDLSISVCDVENDL	214
106	Niben101Scf01611g11002.1	NBERF106	MDKTQDIEGKKIKRNRDSSKHPDYRGVRMRNWGKWVSEIREPRKKSRIWLGTFPNPEMAARAHDVAALSIKGNSAILNFPELAASLPRPVTLSPRDIQAAAAKAAAMDKFDNNNINITTTSSSSHSSPNNSTSSSSNMSTSSSLSSLVSAIDLATSEELTQIIELPRLGTSYFDDELKNDLVYSDHSAVEGWLYPDDGGMIYSSCFEPSLLWDY	214
107	Niben101Scf11694g01005.1	NBERF107	MVRPTKSSDDISSSSSSSLKYKGVRKRKWGKWVSEVRLPNSRERIWLGSYDTAEKAARAFDAAQFCLRGEAAKLNFPDNPPDILNGGSMTAAEIQVAAVRFAISDPEPQESISGPMDNSDLSFSSLSSSSELLHPESPSTSISDGTVQPEYEVTEMPLHSEFLDLFFSLGTANNEYDFRTFSEFSDLTGDHFLPALIDSGKENYEGCTLDGSFLWNF	217
108	Niben101Scf15451g00001.1	NBERF108	MEFSSPQIQYPNFSFFQDQSPLLWNNELFLDHEHLANYPWEVDSVNEKDDRQVPRSSSSSDVTNSSKGGNYHEEEVTSHNSSQKKDTTKGEKHYIGVRKRPWGKYAAEIRDSTRNGIRVWLGTFNTAEEAALAYDQAALSMRGPLALLNFPMDKVRESLENIKYFCEDGLSSAAVLKATNKMRCAKHRRNRKKKTVLVFQDLGADLLDELLTSSSQK	217
109	Niben101Scf01752g05003.1	NBERF109	MRRGRATAAAKQAAEVPTEAGSGGLKEIRFRGVRKRPWGRFAAEIRDPWKKTRVWLGTFDSAEEAAKAYDAAARTLRGPKAKTNFPLPPYSHFNQTVNPNDPFIDPRLYSQESHPIVIQRPTSSSMSSTVESFSGPRPAPRQQTTVLPSRKHPRSPPVVPDDRRSDCDSSSSVVEDGDCDNENDNIVSSVFRKALPFDLNFPPPMDADSDDLHCTALCL	219
110	Niben101Scf09236g00001.1	NBERF110	MRRGRATAAAKQAAEAAPAAGSGGLKEIRFRGVRKRPWGRFAAEIRDPWKKTRVWLGTFDSAEEAAKAYDAAARTLRGPKAKTNFPLPPYSHFNQTVNPNDPFIDPRLYSLENHPIVIQRPTSSSMSSTVESFSGPRPPPRQQTAVLPSRKHPRSPPVVPDDCRSDCDSSSSVVEDGNCDNEYDNIVSSVFRKPLSFDLNFPPPMDADSDDLHCTALCL	219
111	Niben101Scf09659g03018.1	NBERF111	MWLGTFDTAEEAAQAYDEAACLLRGSNTRMNFHNHSPANSALSMKIRNLLNQKRSLTNIKSKTTPKNHTTSTTISSCTSPLSVSNSFSFNTDTSGSRSHQETQIFGDAYKPDLSNFMAGFDQMGSSNFDHSSTFSTDFDRILLDEEVGNFQVSKGGVDNEIGNVEDQIPEFEHMKVQRQISASLYAMNGVNEYWENIHDCNIDAAFWDLPMLYQMFCPS	219
112	Niben101Scf16007g00010.1	NBERF112	MDIFRSYYSDPLAECSSISDSSSSSCNRANLSDEEVILASNNPKKRAGRKKFRETRHPVYRGVRKRNSDKWVCEVREPNKKSRIWLGTFPSAEMAARAHDVAAIALKGRSACLNFADSAWKLPIPASTDAKDIQKAAAEAAEAFRSSEAENMPEYSGEDTKEVNSTPENMFYMDEEALFCMPGLLANMAEGLMLPPPQCSQIGDHMEDDFDMPLWSYSI	219
113	Niben101Scf16007g00011.1	NBERF113	MDIFRSYYSDPLAECSSISDNGGSSCNRANLFDEEVILASNNPKRRAGRKKFRETRHPVYRGVRKRNSDKWVCEVREPNKKSRIWLGTFPSAEMAARAHDVAAIALKGRSACLNFADSAWKLPIPASTDAKDIQKAAAEAAEAFRSSEAENMPEYSGEDTKEVNSTPENMFYMDEEALFCMPGLLANMAEGLMLPPPQCSQIGDHMEADVDIPLWSYSI	219
114	Niben101Scf01090g02001.1	NBERF114	MDSSFMHYQNPYDQNYSPHSSSWDEPLFHHNYLPFNVNDTEDMFLFNLVAEGDRTVVKESSAETINTSSSSGTKEEEVTSCEPQKEKNYRGVRKRPWGKFAAEIRDSTRNGVRVWIGTFDSAEAAALAYDQAAFAMRGSLAILNFPVEIVKESLSEMKCRFDEGCSPVIELKKRHSMRKKTQSRRNIVVRKDESNVVVFEDLGAEHLEELLSSSECVTNW	220
115	Niben101Scf01082g04001.1	NBERF115	MQGISLEFDQQNFLDTMQHLFNDHDFPQIFSELNSFNNTIQTSRNPGSENTVFAQNMVQHNQEKYADDHIVPLQETSSENNKEPSSDQVPFEKKKYKGVRRRPWGKYAAEIRDPKRKGARLWLGTYETPEDAALAYDRTAFKLRGSRAVLNFPHLIESNVTEINRVRPRRRSRSPDIELSYDQNDGPISKRRNVDLINSLATANLDSRSIVERCLTSSFFA	221
116	Niben101Scf17204g01001.1	NBERF116	MDSSFMHYQNSYDQNYSPESSSWDELLFHHSSLPFNVNDTEDMFLYNLVAEGDRTVVKESSAETINSSSRSCIKEEEVTSCEPEKEKNYRGVRKRPWGKFAAEIRDSTRNGVRVWIGTFDSAEAAALAYDQAAFAMRCSLAILNFPVEIVKESLSEMKCRFDEGCSPVIELKKIHSMRKKTARSRRNRAVRKDESNVVVFEDLGAEYLEELLRSSECVTNW	221
117	Niben101Scf00282g02006.1	NBERF117	MDIFRIDYSDPLAEYSSISDSSSSSCNRANLSDEEVMLASNNPKKRAGRKKFRETRHPVNRGVRKRNSDKWVCEVREPNKKSRIWLGTFPSAEMAARAHDVAAIALRGRSACLNFADSAWRLPIPASSDAKDIQKAAAEAAEAFRSSEAENMPEYSGENSKEVNTPETPENMFYMDEEALFCMPGLIANMAEGLMLPPPQCSQIGDHMELADVYMPLWSYSI	222
118	Niben101Scf00298g00001.1	NBERF118	MVKPNVKDSCENAPSSSSSSSKYRGVRKRKWGKWVSEVRLPNSRERIWLGSYDTAEKAARAFDAALFCLRGKTANFNFPENPPEIVNGRSMTPAEIQVAAAQFANSDSEPRVSNWVNPRDNSDPSSSSSEIFCAESPSVSVSNGLVGLESEKTEMTLDNGFVDMFSSMGTANDMSNFGIFPGFDDLSGEYYVPPLPHLDNTAEENYMNYDGFHLQGSSFLWNF	223
119	Niben101Scf05173g08002.1	NBERF119	MNSADVTFSFSDFNLLESIKQHLLNDSDFSEIISPMSSSNALPNSPSSGFGSSPSAENSFEISLWAENFEETIPNLEEKCESEEETKGNVVARENNAPQDWRRYIGVKRRPWGTFSAEIRDPNRRGARLWLGTYETAEDAALAYDQAAFKIRGSRARLNFPHLIGSNMRKPARVTERRSRTRSPEPSSSSSTSSSVNVPRKRKIDVINSIATVCHGWNLQMLL	223
120	Niben101Scf06200g01006.1	NBERF120	MAENDLLTGTVAVPTANGGVRSDEVHYRGVRKRRWGRYAAEIRDPGQKTRVWLGTFDTAVEAAKAYDTAARLLRGRRAITNFSPTTEDNLMNTRDFMAKLSTRNHVNINTNNHGPIQNSDIGSSSGGGGAVRIPLPNQNPQSRHFPVAGCSAPLQLARDRYYVEALTRAGVITNRDPSSQKKTIDFIGGVVNVGSGRGFPTAPPTTSTRALNLELTLAPPGNL	223
121	Niben101Scf07310g01001.1	NBERF121	MRRGRAAAVPAPVAGEPNGSGGSKDIRFRGVRKRPWGRFAAEIRDPWKKTRVWLGTFDSAEDAARAYDAAARALRGPKAKTNFPLPYAHHHHFNQGLNTNNDPFVDSRFYPKDYPIISQRPTSSSMSSTVESFSGPRPPPAPRQQTTASSRKYPRSPPVVPDDCHSDCDSSSSVVDHGDCEKENDNDNIASSSFRKPLLFDLNLPPPMDDAGADDLHCTALCL	223
122	Niben101Scf05618g01002.1	NBERF122	MSVPISQLVTTNEIKKKNKEALRFLKHFRKGQLQLAFAFINGETTTLQRKTRIWLGTFETAEDAARAYDEAARLMCGPRARNNFPYNPNMPQTSSSKLLSATLTAKLHKCYMASLQMAKNSAQEQHQQPPPRKIQTSYAQTAVANAGNHVPYETKPQMLMSKPTFLAQQQEAAAGVNWGVMKVEAVEHTPQFINTLEEDHIEQIIEELLDDGSIELCSVVSSHH	224
123	Niben101Scf19266g01015.1	NBERF123	MAENGHLARTVAVPTANGGEVRSDEVHYRGVRKRPWGRYAAEIRDPGQKTRVWLGTFDTAVEAAKAYDTAARLIRGRRAITNFSPTTEDNLMNNRDLMAKLSTRNHVNININNHGPIQNSDIGSSSGGGGTGRIPLANQNPQSRHFPVTGCCASLQLARDRYYVEALTRAGVIINRDTSNPKKTIDFIGGGVNCGSGRGVQSEPPTTSPRPHNLELTLAPPGNM	224
124	Niben101Scf02775g00003.1	NBERF124	MYGNDYALLESIKCHLLDDWDTTPVTTSDNSTTSTYSRNNSIESIEFDYTAHTFLHDIINEGIGYGFDPTILNIKLEPEISVQSPEVWNFTNFTEFVAPPETAAPLVTRTVAAPPKAKHYRGVRVRPWGKFAAEIRDPAKNGARVWLGTYETAEDAAFAYDKAAFRMRGSRALLNFPLRINSGEPDPIRVGSKRLSTSPEHSSSSPKKRKQNGSGRYTQLGANQL	225
125	Niben101Scf00839g00006.1	NBERF125	MVSALRHVISGADGKTDGEAAQLLREVENARSASILPRRSIVEPAVSAATYLACHIGNTTTTFHVKQENLELQKGRRRRRNTKKEYRGVRQRPWGKWAAEIRDPHKAQRVWLGTFITAEEAARAYDKKAIEFRGEKAKTNFPISEYAAAAATAVTDHHNNKMPLVVEELQVQNGVDNIIVAGDDNGESSIHNGDDNGESNMQTGDDFWDTLEDDGLVKWITKNMSQ	226
126	Niben101Scf05855g00002.1	NBERF126	MQGISLEFDQQNFLDTMQHDLFNDPDFSQIFSELDTFNNTIQTPRNPSSENTVFAQNIVTYNQEKYADDHFVPLQETSSENNKEPSPDQVPLEKKNYKGVRRRPWGKYAAEIRDPERKGARLWLGTYETPEDAALAYDRTAFKLRGSRAVLNFPHLIESNVTEINRVRPRRRSRSPDIELSSDQNDGPVSKTRNVDLINSLATANLDRQSIVEICLTSSFFCPKKI	226
127	Niben101Scf11303g01019.1	NBERF127	MESSKSPSSESLNKSSKNIQEKQVTKTKSLNDGKKYIGVRQRPSGRWVAEIKDSSQKLRLWLGTFDRAEEAALAYDNAARLLRGRNAKTNFKYQGILKPNEENCSLLEKNPRLYQLLKLAIMKKIAGNKYQNEIETDQPFVQENMGCDQDKEEICRIQLLQGSSSKVYSSVIVAPSFSASITHQSGKKDDEEEDGNHYQTSAQLFECLFSHANNSSVENNGLNSSF	226
128	Niben101Scf01426g00001.1	NBERF128	MAVKNKVSNGDMKGGNVKTNGVKEVHYRGVRKRPWGRYAAEIRDPGKKSRVWLGTFDTAEEAAKAYDTAAREFRGPKAKTNFPLPTENQSPSHSSTVESSSGETGVHAPQNAPFELDLTRRLGSVTADGGDNCRRAGEVGYPIFHQQPTVAVLPNGQPVLLFDSLWRPGVVNRPQPYHVTPMTMGFNGGNAGVGPTVSDSSSAVEEKQDDEKRGIDLDLNLAPPTEF	227
129	Niben101Scf03035g01006.1	NBERF129	MSVKNKVSDGDLKGGNVKTNGVKEIHYRGVRKRPWGRYAAEIRDPGKKSRVWLGTFDTAEEAAKAYDTAAREFRGPKAKTNFSLPSENHSPSHSSTVESSSGETGVHAPQNAPLEMDLTRRLGSVAADGGDNCRRAGEVGYPIFHQQPTVAVLPNGQPVLLFDSLWRPGVVNRPQPYHVTPMAMGFNGVNAGVGPTVSDSSSVVEENQYDGKRGIDLDLNLAPPTEF	227
130	Niben101Scf06081g02026.1	NBERF130	MDFEDDQTSNSSCSSSDHDILDKEKNFDHSSCSMNVIKPSLHNKRRAGRKKFKETRHPFYRGVRRRNGDKWVCEIREPNKKSRIWLGTFSDPEIAARAHDVAALALRGINAALNFPESSWSLPKAQSSSPRDIQIAALQVSNKEVMSSPLKHSMSYLELEESSCFQSTNNDQENSLKGYYDSCELMEFVDEEAMFNMPILIDSMAEGMLMTPPAMKKGFNWSDCFGET	228
131	Niben101Scf03092g00007.1	NBERF131	MNNSSSRSHVRVAVSDEEDNNMLALRKPKKRAGRKKFKETRHPVYRGVRRRNNDKWVCELREPSKQKRIWLGSYPTAEMAACAHDVAALALRGPLATLNFADSAWRLPVLVSKDPKDLRHAAAKAAEAFRPGEETDVNPRVAANTANGSKEMKAAAEEDYNCMQNTVAAENVLCSNNSCSEVGMVGTQEWQANMEERSLFSPNPCLLGSCFSWDDDVESDVEVSLWCYSL	230
132	Niben101Scf01947g01008.1	NBERF132	MSSNSLLEIDTSFSHSNFFFQDQSPILQWDDDLFFNNPWFDDDQSPIPYNSEKDENHQIFEESSDNTIISKGSTSPGQELEEVTSQEEKEKEKEKEKEEEEKHYIGVRKRPWGKYAAEIRDSTRNGIRVWLGTFDTAEEAALAYDQAALSMRGPWSLLNFPLEKVKKSLEKIEYSCKDGLSPAAVLKATHKTRRVKHKRLGRKKKNKETHNVLVFEDLGAELLEELLMTSS	231
133	Niben101Scf13779g00003.1	NBERF133	MAPKEKGTAAGKVNGVSKEVHYRGVRKRPWGRYAAEIRDPGKKSRVWLGTFDTAEDAARAYDAAAREFRGTKAKTNFLVLEQENVKLANGNRSPSYSSTVENSPPVMPENSPPAVILDTSPLDLSLGGSGSLFSNGVGRFLFQNHLFHGSPVAGGVTSVNHMYYLEAVQREQVISSYKKSCRTTAEFIAGCGGGASGESDSSSVIDFMGHDLKPTTRPINLDLNLPPPENM	231
134	Niben101Ctg16385g00003.1	NBERF134	MDIFGNYYLDSLIPTPSTSFLPAAESSTSFDKGSCSETPNYSDEEVMLASNYPKKRAGRKKFRETRHPVYRGIRRRNTNKWVCEVREPNKKSRIWLGTFPTAEMAARAHDVAVITLKGRSACLNFADSVWRLPIPASAAAKDIRKAAIEAAEAFRPVESDGENSREIIVEHVIQEVVAELPDNVLFIDEEALFCMPRLLANMAEGLMLPPPLCIIDGYGMEAEHSDISLWSY	232
135	Niben101Scf03245g04004.1	NBERF135	MDIFENYYFDPLIPTLSTSFLPAEVLPEYSTSSDNGSSGRPSYSDEEVMLASNHPKKRAGRKKFRETRHPVFRGIRRRNSNKWVCEVREPNKKSRIWLGTFPTAEMAARAHDVAAIALRGRSACLNFADSAWRLPIPASATAKDIQKAAAEAAEAFRPLESDRENSREIIDNQVIQGVVAELPDNVLFLDEEALFYMPGLLWNMAEGLMLPPPQCIDGYVMESDHADMSLWSY	233
136	Niben101Scf03321g01009.1	NBERF136	MMDNSSSSCSSVIRAEASDEEVILLASSKPKKRAGRKKLKETRHPIYRGVRRRNNDKWVCVLREPNTQKRIWLRSYPTAEMAARAHDVAALALRGHLATLNFADSAWRLQVPVSKDPKDLRQAAARAAEAFWPGEETDVNSRGAANAGNGHEEMKAAAEENAANDCMQNLVTAENVLYSNSCGEVGTFGTQEWQTNMEEGSLLSPNPCLLGSCFSWDDDVESNVEVLLWSYSI	233
137	Niben101Scf08546g00001.1	NBERF137	MYQPISTELPPTSFSSLMPCLTDTWGDLPLKLDDSDDMVIYGLLSDALTAGWTPFNLTSTEIKAEPRKEIEPATSPVPSVAPPMETATTQAVAPKGRHYRGIRQRPWGKFAAEIRDPVKNGARVWLGTYETAEEAALAYDKAAYRMRGSKALLNFPHRIGLNEPEPVRLTIKRRSPEPASSSISSASENGLPKRRRKAVAAKQAELEVQSRSNVMQIGCQMEQFPVGEQLLVS	233
138	Niben101Scf00428g09009.1	NBERF138	MHGNYEADNDFAILESIRLHLLEDWEAPLTSSDNSTTSDLSRSNSIESNVFPNRLPNEYNYTADMFFNDIFNEGIVGYGFEPASEFTLPSIKLKPEMTVQSPEIWNLPEFVAPPETAAEVKLEPPAPPKANHYRGVRVRPWGKFAAEIRDPAKNGARVWLGTYETAEDAAFAYDKAAFRMRGSRALLNFPLRINSGEPDPIRVGSKRSSMSPEYSSSSSSSSPSSTKRRKNVVQ	234
139	Niben101Scf02775g00002.1	NBERF139	MYANCEVDNDFAILESIRLHLLEDWEAPLTSSDNSTASDLSRSNSIESNMFPNCLPNQYNYSAAMFFNDIFNEGFVGYGFEPASEFTLPTIKLEPEMTVQSPEIWNLPEFVAPPVTAAEVKLEPTAPPKAKHYRGVRVRPWGKFAAEIRDPAKNGARVWLGTYETAEDAAFAYDKAAFRMRGSRALLNFPLRINSGEPDPIRVGSKRSSMSPEYSSSSSSSSPSSTKRRKNVVQ	234
140	Niben101Scf03548g02037.1	NBERF140	MERGDFSSSEMEEKENNDNIDHPQLQQEITYSARSQHDISAMVSVLSQVIGNTEIRDPKKAARVWLGTFETAEAAAVAYDEAALRFKGNKAKLNFPEKVQGKFQYLTNQDHHLPNNIVQQQYIATTSTNNNPLPFQEHYPSIHHYAQLLQNDSNITDLNFGISPCYNLQLSGSLDFSQSSSNSTLSELPALTLPSSYKQEEEEVFMRFSSDFGTSSSSCAPHESNWEEFEDRKS	234
141	Niben101Scf00454g04003.1	NBERF141	MNHSIYTELLPANFPGDFPVYRRNSSFSRLIPCLTETWGELPLKVDDSEDMVIYTLLKDALNVGWSPFNFTAGEVKSEPREEEIVVSPAETTAAPATESPRGRHYRGVRRRPWGKFAAEIRDPAKNGARVWLGTYETDEEAAIAYDKAAYRMRGSKAHLNFPHRIGLNEPEPVRVTAKRRASPEPASSLENSSPKRRRKAVAAEKSEAVEVESESNVLQVGCQVELFTRGHQLIVS	236
142	Niben101Scf07172g00019.1	NBERF142	MQRSNKRFREDGTSYTDQNNQQFSHFPRLTGEEEYSVMVSALKNVINGVPAEQEPCPFCRIKGCLGCDIFGTTSSAAVNFAESKIVAADDNKKKSTIIPIAKKKKKNYRGVRQRPWGKWAAEIRDPRKAARVWLGTFNTAEEAARAYDKAAIEFRGPRAKLNFSFADYTENQEQQSTSSSSPQQLPEPQLQQGNNAEFGSEILDQLMGDNEIQDWLTMMNFNGDFSDSTGGNVPSV	236
143	Niben101Scf02408g00021.1	NBERF143	MQRSNERYREDGTSYTDQNNQQFSHFPRLTGEEEYSVMVSALKNVINGVPAEQEPCPFCRIKGCLGCDIFGTTSSAAVNFAEPKVVAADDNKKKSATTTAVTKKKKKNYRGVRQRPWGKWAAEIRDPRKAARVWLGTFNTAEDAARAYDKAAIEFRGPRAKLNFSFADYTETQEQQSASSSSPQQLPEPQLQQGSNTEFGNEIWDQLMGDNEIQDWLTMMNFNGDSSDSTGGNVHSV	237
144	Niben101Scf01082g07003.1	NBERF144	MEMNPDDETLFFSESHHLLESIKQHLLDDSDFSEIFSPMSSCNEILPHSPSSSFSSFDFDCSFLNWDENFEETLKPTEQNPSHESHEKYSESEEQTQGPAVAREKKAPRDWTRYIGVKRRPWGTFSAETRDPSRKGEGARLWLGTYETAEDAALAYDQAAFKIRGSRARLNFPHLIGSNVRKPARVTARRSRTRSPEPWSSSSTSSSENVPRKRNIDVINSIAKAKFLRHGLNLQRLA	238
145	Niben101Scf02063g05001.1	NBERF145	MDSSCSSHFFYPMNSDLSSDSSWEWSTLNSTNSLPFNLNDSEEMLLFGVLTNAAQETTSETVTSYHVKEEEVSSKSKVVKEIEEKPAKEKSFRGVRRRPWGKFAAEIRDSTRNGVRVWLGTFDSPEAAALAYDQAAFSIRGTSAILNFPVETVQESLRDMKCHVDEDGSPVVALKKRHSMRKRSLNSKNNSNSKVVREVKMENVNVVVFEDLGADYLEQLLSSSSSDQSSCNEAFLPW	238
146	Niben101Scf05173g09004.1	NBERF146	MEMNPADETIFFSESHPLLESIKQHLLDDSDFSEIFSPMSSSNEILPNSPGSSFSSFDFDCSFLNWDENFEETSIPTDQNPSHESHEKYSETEEKTQAPAVARERNAPRDWTRYIGVKRRPWGTFSAETRDPSRKGEGARLWLGTYETAEDAALAYDQAAFKIRGSRARLNFPHLIGVNMPKPARVTARRSRTRSPEPSSSSSTSSSENVPRKRNIDVINSIATAKFLRHSLNLQRLA	238
147	Niben101Scf07896g01006.1	NBERF147	MAPKEKGTAAMATVTAIGKVNGVSKEVHYRGVRKRPWGRYAAEIRDPGKKSRVWLGTFDTAEDAARAYDAAAREFRGAKAKTNFPMLEPEIVKLANGNRSPSQSSTVENAPPVMPDSLPPAVMLDASPLNFSVGGSGSLFSNGVGRFLLQNHLFHGSPVAGGMTPVNNMYYLEALQREQVISSYQKSCRKTAEFIAGVSSGASGKSDPSSVIDIRGHDLKPTTRPINLDLNLLPPENL	238
148	Niben101Scf03479g03001.1	NBERF148	MVSIRRRKLLGLCSGRSSFLVPLPKFSENGHIAENHFLNNKPTSVHPMPSTDIDESKERTAVKIVPGSSNGHASGSLIEQTAQQFPEVKRRKRHRRKHFENQEPCLMRGVYFKNMKWQAAIKVDKKQIHLGTVGTQEEAARLYDRAAFMCGREPNFEISEEEKQELSQFKWDEFLAFTRSAITNKKTRRRSGVGARRKSEPLSSTLNSEEEDEDEDEEGEPESNSFSASEDIEQDVSLS	239
149	Niben101Scf06596g03021.1	NBERF149	MVMKAEQKTLAAEASKSIMALSSSSSSNNNNTNNNMKMKKKKYKGVRMRSWGSWVSEIRAPNQKTRIWLGSYSTAEAAARAYDAALLCLKGPSAATNLNFPFNSSFYHHIDLDHHTSTTLSPKAIQRVAAAAASAAEGAGVNVENNVPSPPLSSTSTSTNSSSPLSHEDQLDEVFLLPIFDHHTLLEEETTVSLMGQWYNFDSPKYNDMLHGTVYFDPPLMEEVYYEEGSADIPLWSFC	239
150	Niben101Scf09087g00009.1	NBERF150	MVKTEQKTLAAEASKNIMSLSSSSSSSNNNNNNNMKIKKKKYKGVRMRSWGSWVSEIRAPNQKTRIWLGSYSTAEAAARAYDAALLCLKGPSAANNLNFPFNSSFYHHIDLDHHTSTTLSPKAIQRVAAAAASAAEGVAVNVENNVPSPPLSSTSTSTNSSSPLSHEDQLDEVSLLPIFDHHATLEEETTTVSMMGQWYNFDSPKYNDMLHGTVFFDPPLMEEIYYEEGSADIPLWSFC	239
151	Niben101Scf06200g00001.1	NBERF151	MAQNVMGDAAVTVAVPAAENMNGGVSEEIHYTGVRKKLWGRYEAEIRDPLRNTRVWLGTFDNAEDAAIAYDAAARRFRRTKAKTNFPSTTVTKDWSLAPLNLNHGGESSVGSAGSFTYLKQNNLNPGGGSSVGSAASFTYLKQNHQFRHFPAAGGSAPPSARDYQYLEALTGAEVSHHDPSSQRGTIAFLGGGDSVSGCGIQTESESSSVLNYNFNDVNQPTMTANCLNLDLNLPPPDNM	240
152	Niben101Scf00113g03002.1	NBERF152	MVSIRRRKLLGLCSGRSSFLVPLPKFSENGHIAENRFLNNKHTSVHPMPSTDIDESKERTAVKVVPGSSNGHASGSLIEQTAQQFPGVKRRKRHRRKHFENQEPCLMRGVYFKNMKWQAAIKVDKKQIHLGTVGTQEEAARLYDRAAFMCGREPNFEISEEEKQELRQFKWDEFLAFTRSAITKKKTRRRSGVGARRKSEPLSSTLNSEEEEEEEEEEEGGDPESNGFSASEDIEQDISLS	241
153	Niben101Scf05773g00002.1	NBERF153	MEGQSQNQSNEPIKYKGVRLRKWGKWVSEVRLPNSRERIWLGSYDTAEKAARAFDAAQFCLRGPNAKFNFPENPPDISGGQRLSPAEIQVVAAQFANEYVYPQTTTQETAPISHVQNTHVLKMENEETSQSSTCDHDLIGKMDNATTADWSFLDMLENYPNNNAAAPAPQPHISSLPPSPAIGTNNFDFGYYPGLETLSSNLYSPLHFPTRTTTGNGDEHGYEDSGNGDEHFSQHSYLWNF	241
154	Niben101Scf06969g00003.1	NBERF154	MAEFGVEASSFSSNYTNNMVLDSSNKSKTEEAEEKRRIKRTRDQYFNRTENRAYPVYRGVRMRSWGKWVSEIRQPRKKSRIWLGTYPTPEMAARAHDVAALSIKGESAILNFPQLVESLPRPASVSPTDVQAAAAKAAAMENVLNSASSSSSPSSSSSSALTSVSTSMESTAALEELLGQIIELPSLEGTFDSDELKLSDSADGWVYPPLPWGAFDGEFCGYSFEQTDIGESLVSTTDWRC	241
155	Niben101Scf01539g00001.1	NBERF155	KSEQSKYTQSHTDFFFSSSSVLTFNKYSHSSKKAYINQKIHSRMTKRKIKQSANTGNRHPVYRGVRMRSWGKWVSEIREPRKKSRIWLGTYSTPEMAARAHDVAALSIKKNSSILNFPHLVNSLPRPISLSPRDVQVAAAKAASMEEPPISSISSSNSSSSSDCTLETITSASDVELGEIIELPSLEGSFDLNESKTELRLSDSVDGWLCAPWWAPDSDFGEYLLEQDAVGESLIRSNFERQK	243
156	Niben101Scf07761g02006.1	NBERF156	MDSSSCSSHFFYPMNSDLSSDSSWEWSNLNSTNSLPFNLNDSEEMLLFGVLTNAAQETTSETVTSYHVKEEEVSSKSKVIKEIEEKPAKEKSFRGVRRRPWGKFAAEIRDSTRNGVRVWLGTFDSPEAAALAYDQAAFSMRGTSAILNFPVETVQESLRDISYHVDEDCSPVLALKKRHSMRKRSLNFKKSSNSNSNNKVVREVKMENVNVVVFEDLGADYLEQLLSSSSSDQSSCNEAFLPW	243
157	Niben101Scf01701g03007.1	NBERF157	MSSTYSVERKTKKLTQATSRKGCMRGKGGPENASCTYKGVRQRTWGKWVAEIREPNRGARLWLGTFENSYDAAVAYDAAARKLYGADAKLNLPHLYSKQAQAQNSRPNTMGLDNAGGPVSTPPTCNPAAVYNVASPSTWSMGNDNTSFYFNNDFGNNSFSTADQTSFQFLDINQTAEEFDENNINQNDGIGGEMWRDLNMNLPEIDDSSIWEEAKASTSFQEAVTDPGIYACNLADGINYPPWCG	245
158	Niben101Scf02775g00001.1	NBERF158	MMYRNCELENDFAILESIRFHLLEDWEAPLTSSDNSTTSDLSRSNSIESNMFPNCLSNEFDAADTLLYDILNEGAGYGFEPASDFTIPNVKLEPEISIQSPEIWNLPEFVTPPETKTEVEMESPAVTTPPPPRGKHYRGVRVRPWGKFAAEIRDPAKNGARVWLGTYETAEDAALAYDKAAFRMRGSRALLNFPLRVNSGEPEPIRVGSKRSSMSPEYSSSSSKSSASTPKRRKKVSQGTELAVL	245
159	Niben101Scf10763g00021.1	NBERF159	MEYAESIGNIQATTSIDRPLKKLKIPSSEHNDLRATTCDPKHYTYTAHNSRFSFPFALDDQFPMQSPVQNQTMISFAPQNCFLDYDPRHLPLVQCRNTYNYGTVSTTPKRYRGVRQRHWGKWVAEIRLPRKRTRLWLGTFDSAEEAAFAYDVEAFRFRGSDARLNFPHLFLSDPSVNNIEETNSAADLTTSFSNGCYQVQHKNKRGLMPRPTTKLGAEPYEPKVSRTIGPPLVQSSPFHKSILVI	245
160	Niben101Scf01374g05001.1	NBERF160	MAEVELPCPETESSSTNSSSSSSSLSSESMHNSVFDSSKELPEEKKRPTKRKRETNNSQNRAQNQVYRGVRMRSWGKWVSEIREPRKESRIWLGTYPTAEMAARAHDVAALSIKGNSAILNFPNLIDSLPRPVSNLPRDVQAAAAKAAAMNFNLTSVSSSSSSSSSTTITSTCSEELGEIIELPNLEENEETKTELRWSDSVEGWLYSPWWASSDSDFCGYFLEQSAPGTGESLIPSSFEILKWGC	246
161	Niben101Scf05459g00001.1	NBERF161	MNNINSISCSLDSSHSQETSSSSSGRSSVVPDEGIVLLATSRPKKRAGRKKFKETRHPIYRGVRRRNNNKWVCELREPSKQKRIWLGTYPTPEMAARAHDVAALALRGNSATLNFADSLWRLPVIVSKDPKDLRQAAVKAAEAFRQDPELVGLDYMNYEVNSNEQLKCKENVVNDSSYDMGIKELKMKNMEMENILCCNWGEDSEKSWQEKMAEGLLFSPTPRLGDCFIWDDVESDVEVSLWNYNI	246
162	Niben101Scf00428g10006.1	NBERF162	MYGNEEYDNDYALLESIKCHLLDDWDTTPVTSSDNSTTSVYSRNNSIESHMFPNCLPNEFDYTADTFLHDILNEGNGYELEPSNFTIPGVKLEPEMTLQSPEIWDFTNFTEFVVPPETAAEVKVEPPVVTRKAAAPPKAKHYRGVRVRRWGKFAAEIRDPAKNGARVWLGTYETAEDAAFAYDKAAFRMRGSRALLNFPLRINSGDPDPVRVGSKRLSTSPEHSSSSPKKRKQNGSGRYTQLGADQL	247
163	Niben101Scf07693g00011.1	NBERF163	MEDQEQRINLQTQADYHRHGLNSPSNTTSSSSSFSSSFSSSNELTRKDYYSKRSSRKVQELVEINEIGEEKKKRKKDEDDKHPTYRGVRKRSWGKWVSEIREPRKKSRIWLGTYPTAQMAARAHDVAALTIKGNSAYLNFPYLAHLLPRPTSASSKDIQAAAAKAAAIIFPEENEEIRVEPSRVELRSCHSSTTLFLENTQEELANSLSREDDDTFFDLPDLSVDVVDQTDRYWVASGPVRSGPGPDP	248
164	Niben101Scf02316g03001.1	NBERF164	MVVSKTVKFSQHIVTKNKHVPEQNEKSNFHSKFSQRVVRIILTDADATDSSDDERQNTGRRVKRHVTEINLMPSPNLICEKKRRLLSPDTDVTCRKKFMGVRQRPWGRWAAEIRDSTRGKRVWLGTYDTPEEAATVYDEAAVKLKGPDAVTNFPKVLTADITETESVTDGGEKSENDVALSPTSVLRNDYFTPFDDLRFCEVDAFGFDVDSLFRLPVFGMSEKYYGEEFGEFDFDDFALEARSCGLFCCF	250
165	Niben101Scf08196g00012.1	NBERF165	MILQPPVKFSEHLVTTNKEVHELNMKNPQKVVRIIFTDGDATGSSDDEDDQFMVRRVKRYVTQINFTLLPESPKQDAQPQQSSRKRCLPSSDSDVSCRKKYRGVRQRPWGRWAAEIRDPTRGKRVWLGTYDTPEEAATVYDRAAVMLKGPDAVTNFPLVSPASETTESESIMVSPAKTEVSSKDVALSPTSVLRSDDFGPFDGSLGFSEVDAFGFEIDSPFGLTGFGMSEKYFAEEFSEFDFDDFALEVR	250
166	Niben101Scf00262g04006.1	NBERF166	MIRNPVISPMDISKTVKFSQHIVTKNKHVSEQTEKTNSQTEVSRRVVRIILTDADATDSSDDEGQDIARRVKRHVTEINFMPSPNLICEKKRRLVSPDTDVTRRKKFRGVRQRPWGRWAAEIRDPTRGKRVWLGTYDTPEEAATVYDEAAVKLKGPDAVTNFPKVITADITETESVTDGGEKSENDFTLSPTSVLRNDYFTPFSDLGFCEVDAFGFDVDSLFRQPEFGMSEKYYGEEFGEFDFDDFALEAR	251
167	Niben101Scf01085g03003.1	NBERF167	MILQPPVKFSQHLLTTNKQVHELNMQNPQKVVRIILTDGDATDSSDEEDDQFMVRRVKRYVTQINFTSLLPESPKQDSQPQQSSRKRCLPSSDSDFSCRKKYRGVRQRPWGRWAAEIRDPTRGKRVWLGTYDTPEEAATVYDRAAVMLKGPDAVTNFPLVSPAIETTEAESIIVNPAKTEVSSKDVALSPTSVLRSDDFGPFDGSLGFSEVDAFGFEIDSPFGLTGFGMSEKYFAEEFSEFDFDDFALEVR	251
168	Niben101Scf03772g00001.1	NBERF168	MEEKSHIFTNINNETTYSTIPHFSSSSSLSTRPITLASSKQETNNKKIKCSDMNKKTKKIDDLKHPIYHGVRKRSWGKWVSEIREPRKKSRIWLGTFATAEMAARAHDVAAIAIKGHLALLNFPELVHQFPKPVSKCAKDIQAAATKAAALNICSTNCITEESQGELMEQFSSEEIESRESSSSTSSLTCKNEDPFLDLPDLLLDLSQKFDKFCYYNSPWEFAGAESNDANHSEFWSEDIYLWDYNYGTVL	251
169	Niben101Scf08516g01005.1	NBERF169	MLPKTDPFILSKKQSLYPNEPIDHLCIDSTNYLDPVHSFSEFSTPKHDQKSPVLEGIAAVVGEHVLFGSCNNQNKRIVDENSESTTAVSILKRSCHAPDKYRGGGGKEEKRNVPVERSYRGVRKRPWGRWSAEIRDRIGRCRHWLGTFDTPEEAARAYDAAARWLRGSKARTNFQIPPVVPLPLHSPPTSTSSSSNTSAEEKKNKKNIPCAKRNTPNNNRKCSVVTSAAHLFSSSSPSTVELDLKLGFGKK	251
170	Niben101Scf06157g01005.1	NBERF170	MEEKYLIFNNMNNQTTYSTIPHFSPSSSLSKRPTTLASSKQETSNKKIKCSDMNKKTKKIDDLKHPIYHGVRKRSWGKWVSEIREPRKKSRIWLGTFATAEMAARAHDVAAIAIKGHLALLNFPELVHQFPKPASKCAKDIQAAATKAAALNICSTNCITEESQGELMEQFSSEEIESSRESSSSASYLSCKNEDPFLDLPDLLMDLSQKFDKFCYYNSPWELVGAESNDSNHGEFWSEDLYLWDYNYGTVL	252
171	Niben101Scf09191g00005.1	NBERF171	MAMKEKLNGGLKGGNVKTNGVKEVHYRGVRKRPWGRYAAEIRDPSKKCRVWLGTFDTAEEAAKAYDTAAREFRGPKAKSNFPLPSENQCPSNSSGPTESSSGETGVHAPHAPSELELTRPLGTVAVGCDHGGCKSEVGLVRNGFPIFHHQPVMGALTSGSSSPVESSSGETGVHAPLELDLTRRLGAVGEGGNHVRNGFPIFHQQPTVAVLPNGQPILLFDSNFVPTGVLNRPMPYRFEQVTVEFNGVSAEAGGS	255
172	Niben101Scf08546g03002.1	NBERF172	MGSPQENCTTLDLIRQHLLDDNVFMEHYCPQPILYSQSSSSSESLNSIASELNNDSFSFEPTLNYADTAQSSNLDISTFFNNSKTEFDCFEFETKPNVLAARISSNSPKQTSFNERKPSLNIAIPLKQQEVVQKVGISNESKKKHYRGVRQRPWGKFAAEIRDPNRKGTRVWLGTFDTALEAAKAYDRAAFKLRESEEQLVVDKEMKIEQERVPTAPLTPSSWSAIWDSGNGKGIFEVPPLSPLSPHMAYSQLVMI	256
173	Niben101Scf01430g00007.1	NBERF173	MCGGAILADLIPRRDHRASSTDLWPNSADFWPSSSFAKPINSRVSYQNVTATQKRVQPSTGNEQIQKTKKRQRKNLYRGIRQRPWGKWAAEIRDPRKGVRVWLGTYNTAEEAARAYDKEARKIRGEKAKVNFPNEDDRYITAYESYDTSYNHESYNCDGSFCSLVDQNTEPGMEYPLAYKNSSASVYNGSEEQKAENEVEKLTEELMACESLMKFYEIPYFDGQSVATVNPAGEAVVGGGSIDLWSFDDVSPTVPITQL	259
174	Niben101Scf06436g05001.1	NBERF174	MKDQEQRINLEIGADYHRRGFFSNSISNILNSPSNATSSSSFSFSSSSSDELTRKDYHSKKSSRNENGEENKNRKKNEDEKHPTYRGVRKRSWGKWVSEIREPRKKSRIWLGTYPTAQMAARAHDVAALTIKGNSAYLNFPHLAHQLPRPASTSPKDIQTAAAKAAAITFPDENEEIRAEPCRVDLPSCHSSTSFFLENTQEIANSLSREDDDTFFDLPDLSIDVVDQNDRYRCPMSTWQQLIGADTTGFRLEEPFMWECQR	262
175	Niben101Scf06913g00001.1	NBERF175	MCGGAIISDYEPVGNRCREISARDLWAELDPISDFWFPSSSSIAGKSDFVQSPTHSYNKPQKSDSGKLNQIEKGTSVKVEKESSGPRPRKNKYRGIRQRPWGKWAAEIRDPQKGVRVWLGTFNTAEEAARAYDEAAKRIRGDKAKLNFPEPPSTPLPPAKRQCTSTIPDQPTLLESSDLMSEKPTSMMNFGYENQTPYYPMEMAAAEDSQRHDYELKEQISNLESFLDLDPDSSPFSGIVDSDPLNIFLMDDFAATQQQEQLFY	264
176	Niben101Scf00315g02001.1	NBERF176	MEDHDLHLKFSISSSSSSITSSSFASSSNGINSPSTTTSSTSSSSFHETINAKTSSNGYTCKSKKSSKIDQDFTKNGNGHGNEENKKKRKNQGDEKHPTFRGVRKRNWGKWVSEIRQPRKKSRIWLGTYPTAEMAARAHDVAALAIKGNSAYLNFPRLADQLPRPASTSPKDIQAAAAKAATSTFLEENIVRDKTEFQIKMQSSHSSTNLNRQELLLNSPSMDHDDTFFDLPDIVIDQYPISTWQLVAGADSGIFRLEEPFLWECY	266
177	Niben101Scf15704g00006.1	NBERF177	MKDLEEQINLKTSAHNHDLSTSFSSSNSLNFPSTITTSSSLSSSSSFLKNNTKISIEYKVKKISKEVQEFNYKANDHIGGTDETERERKKRTMTSTRHIEEFRNWGKWVSEIREPKKKSRIWLGTYSTAEMAARAHDVAALAIKGHSAHLNFPYLADQLPRPASTSSKDIQIATAKAAATTFSEEMKSRPESSHEISSPIEQQSSCSSTDLSTDNDDTFFNLPDLSINKVDLMGRYSDPISTWQLVGADRFKGVTVVSLTIGYGHF	266
178	Niben101Scf16506g00004.1	NBERF178	MADQPADDSTKTSQKNQPPQPSESSQTPFCPIPPPLLQPQPVEETHISPRPLISDIAILENTISTPKTVQLPNIIPTVTTNMSSTSSGGSPSRPTGGKHAVFRGIRSRSGKWVSEIREPRKTTRIWLGTYPTPEMAAAAYDVAALALKGGDAVINFPGNLTSYPSLPPSPSPADIRKAAATAAALMKPQTGESTMPTQPGNDDKSSGNAQMMETGGDEYIDEEALFDMPNLLVDMAEAMMVSPPRMNSPPSSDSPGNSDAESLWSY	266
179	Niben101Scf07579g01012.1	NBERF179	MSAMVSVLSQVIGNTNNNTNISSVNSSVHAISPLTLPQSTGANLQNQSQSTQEQGNQQRKRHYRGVRQRPWGKWAAEIRDPKKAARVWLGTFDTAEAAAIAYDEAALKFKGNKAKLNFPERVQGKTEFSFLTNTTQQEFGIVGQQLPATSSMNNNLPYFQPNYLSQEHFPNVHHYAQLLRDGNNFEMNFRVSPNFYRPISEGFVSESLPNSSLELQQGTSHEQEQGDSYNQQQEEDFLRFPFHYGNSNSSTGPNTGESNWEDFEHRK	267
180	Niben101Scf08033g01007.1	NBERF180	MSSTYSVERKTKKITQATSRKGCMRGKGGPENASCTYKGVRQRTWGKWVAEIREPNRGARLWLGTYENSYDAAAAYDAAARKLYGADAKLNLPHLYNKQAQAQVQVQNSRPNTMGLDNAGGPVSAPPTCNPAAVYNVASPSTWSMGNDHTSFYFNNDFGNNSFSTVDQTSFQFLDINQTAEEFDENSINQNEGIGGEMWRDLNMNLPEIDDSSIWEEAKASTSFQEAVSDPGLYACNLDDEINYPPWCALLYGKERKNMHACKLVKV	267
181	Niben101Scf00454g03001.1	NBERF181	MDLDLIREHLLDDVAFVENYCSSSETSSTLYSQNSSVSECFDSLTSNLKMETFSFDPTNVAQNLNQEFNSFEFEQKPNLVPRITTSNSPKKTSFNERKPSLNITIPNVKKTEEPKTEEVKTEYSVQKKYRGVRQRPWGKFAAEIRDPTRKGTRVWLGTFETAIEAAMAYDRAAFKLRGSKAILNFPLEVSNFKEENNVIEQSVNLNLNSTGKRIREVVNEEEVVVVKKEVKREQMVTPLTPSNWSSIWDCGDGKGIFEVPPLSPFMVS	268
182	Niben101Scf01094g03016.1	NBERF182	MTHVEKNQQQEVACEEILENVWANFISKNEANYEKAQRETNQCPEKWEELPSLERLPSLGRWISMGAETWEELLNEILPPNEKIHLNDESTSKNEDVKVENKKKMVVTRHYRGVRRRPWGKYAAEIRDSSRKGARVWLGTFNTAEEAAMAYDKAALRIRGPKAYLNFPLETVAQAMGLSFPEQESTFPSSVSQIQGAYLGWDDQYISNSRKRVSRDWSMYEDLDVINQLPMEKRIMRSWEEDLDQSDLDILEFEDLGSDYLDSLLSSF	268
183	Niben101Scf01669g04022.1	NBERF183	MEINFQKQQQTEAISKNKLAKLKGKRRSKSRNNFVGVRQRHSGKWVAEIKETTKEIRMWLGTYGTAEEAAHAYDQAAVLLRGSNTRTNFVTRVSQDSPLASRIRNLLHSKKIAKQKCLDYTVVSTSSNSVQSSLNISSSSSLMISNCDDSISSENNTQNFISIKKSKKKVNCFIRPTYLILPWAHQHIHLSQPELSWGFGEGFEFAQELLDIPKNVISAEMGLTEYDIMKVERQISASLYAVNGVRDYMESVYDPYESLWDHPLSNYW	268
184	Niben101Scf12210g07001.1	NBERF184	MDLDLIREHFLEDVTFVENYCSSSETSSTLYSQNSSVSECFDFLTSDLKMETFSFDPINLAQNLNQEFYSFEFEPKRNLVTPATISSSPKKTSFNERKPSLNITIPNVKKTEEPKTEEVKTEYSVQKKYRGVRQRPWGKFAAEIRDPTRKGTRVWLGTFETAIEAAMAYDRAAFKLRGSKAILNFPLEVSNFKQENNVIEQRVNLNLNSCGERVREVEGENEVVVVKKEVKREQMVTPLTPSNWSSIWDCGDGKGIFEVPPLSPFFVS	268
185	Niben101Scf00163g22004.1	NBERF185	MASPQENCTALDLIKQHLLDDVAFMEQYYCSESTTLYSRSSSSESLSSNSDNFSFETNTTQTYNLDISSFFNNSKTEFDIKPNVSAARICSNSPKQITSFKERKPSLNIAIPVKQQEVVQKVELVPTEKKHYRGVRQRPWGKFAAEIRDPNRKAAKAYDRAAFKLRGSKAIVNFPLEVANFKQEFNNEISQSAYSGRKRVRGAENEEQVVIEKEMKREEERVPPAAAAAPLTPSSWSAIWEGEDGKGIFEVPPLSPLSPHMANSKLVMI	269
186	Niben101Scf01212g03003.1	NBERF186	MTHVEKNQQQEVACEEILENVWANFISKNEVNEKAQRETNELCPGKWEELPSLERLPSLGRWISMGADTWEELLNEILPPNDKIHSIDESTSKNEDVKVEKKKMVITTRHYRGVRRRPWGKYAAEIRDSSRKGARVWLGTFNTAEEAAMAYDKAALRIRGPKAYLNFPLETVAQAMGLSFPEQEWTFPSSVSQIQGAYLGWDNQSISNSRKRVSRDWSMYEDLDVINELHLQKKIMRNWEEDHDKSHDLEILVFEDLGSDYLDSLLSSL	269
187	Niben101Scf09704g02001.1	NBERF187	MAPKQLGGAVAVTAAVGEVNGISKEVHYRGVRKRPWGRYAAEIRDPGKKSRVWLGTFDTAEEAAKAYDAAAREFRGAKAKTNFPPEEEENLKIAQNNLGEEENLKIAQNNLGVKMITNVNDNNNRSPSQSSTVESSSRDGLSPAVMVDSSPLDLSLGVKFPFQNNQFRTSPIPGGFSGCGFTGATPAMNHHLYYLEALARAGVINLEKQQQRQTVDFLGGNGGHGGSSGGSGSGTQSESDSSSVIEFMRNDVKPPTRTSLNLDLNFPPPENA	272
188	Niben101Scf08546g05002.1	NBERF188	MASPQENCTTLDMVRNHLLDDVAFMDYYCSETTTLYSQSSSSSESRDQSFSFEPTLNSATTAQSSNNLEVSTFFNNSKTEFDSFEFGTKPNVSAPRSSSLKQTSFKERKHSLKIAIPVKQEDVQKHYRGVRQRPWGKFAAEIRDPNRKGTRVWLGTFDTAIEAAKAYDRAAFKLRGSKAIVNFPLEVSNFKQQDNEIQSLGNSSRKRVRETESEEQLVIDKKMKMEEERVPTAPLTPSSWSAIWDSGDGKGIFEVPLLSPLSPHMAYSQLVII	273
189	Niben101Scf08546g05004.1	NBERF189	MASPQENCTTLDMVRNHLLDDVAFMDYYCSETTTLYSQSSSSSESRDQSFSFEPTLNSATTAQSSNNLEVSTFFNNSKTEFDSFEFGTKPNVSAPRSSSLKQTSFKERKHSLKIAIPVKQEDVQKHYRGVRQRPWGKFAAEIRDPNRKGTRVWLGTFDTAIEAAKAYDRAAFKLRGSKAIVNFPLEVSNFKQEFNNEIQPCVNSSRKRVREPVNEEQLVINKEIKIEEERVPTVPLTPSSWSAIWGSGDGKGIFEVPPLSPLSPNMAYSQLVMI	274
190	Niben101Scf05855g06014.1	NBERF190	MEDHHLHLEFSISSSSSSSSSIISSSFASSSNGLNYPSTTTSSTSSSSFHETINARTPSNNGYTCKSKKSSKIVQDFTKNGNEENKKKRKNEGDEKHPTFRGVRKRNWGKWVSEIRQPRKKSRIWLGTYPTAEMAARAHDVAALAIKGNSAYLNFPHLADQLPRPASTSPKDIQAAAAKAATNTFLEKNSIGNEAESSQIELHSSHSLTDLASKNAQELLNSPSMDHDDTFFYLPDLSIDQMAQNDRYQYPISTWQLAGADSGVYRLEEPFLWECY	276
191	Niben101Scf10438g00010.1	NBERF191	MPVMVSALKRVVRGEDRVLNQGDVGNGAANNWNSNIGSGVGEKREREEQSEQLFLSDIRLSEGNINHQPRRRYRGVRQRPWGKWTAEIRDPYKAARVWLGTFDTAEDAARAYDEAALKFRGSKAKLNFPENIKLLPTSSTHEQSPLKLYPHQNIVGNLGLPTSTFPTDFVENTRVSYFSNDYPIIHTQPNYYNNTNISPQIFLNDDFQRLRPPSSLLNQFQNSSSSSSSSLSSSSSSSQLPFLPRMFFQGSQPTQSSGNDFRATLSDSTYDHPSSSSR	278
192	Niben101Scf06348g00034.1	NBERF192	MAGTEITKTTIITNTNKSSPQLINKPISRKFVGVRQRPSGRWVAEIKDSSQRVRLWLGTYDTPEEAARAYDEAARALRGENARTNFASTLSNTNSDHDQSINMLQSNDSKHGLSFSSLKAKISKNLHSIMARNSENKSSSSKSRVSDHFTFARIFHFKNNYNQYQNHHMDMKKIEKVVQPSIRVLPHVTDNNDLSSWENSSVSDCSSEWTAFRQLGLDSDNGSSDASEYFLGSDPMAGWVSSPDIMSSSSTEGTRSKRFKVSSSVMVPPTFSESPLHGDNY	281
193	Niben101Scf13695g01014.1	NBERF193	MSCIFDEAAQIRSSLSQLLLTSGTNTLDSIFSHCQETNQMTSPVFEPLGSSVYLRQRDLLQKFCQENITNISIPTTSKTFPLHSSLYTRSYRFPEKKKLYRGVRQRHWGKWVAEIRLPQNRMRVWLGTYDTAEAAAYAYDRAAYKLRGEYARLNFPNIRDPSKLGFGDSEKMNAVKNAVDAKIQAICQKVKREKAKKGTKKKCENESKIKETMDSSSSTSSLVGDMISPSVSDDGLWKSENSNCSIFGDCLKEPLMESEFDSCSLARMPSFDPELIWEVLAN	282
194	Niben101Scf01956g05006.1	NBERF194	MCGGAIISDYEPVGNRCRKVSARDLWAELDPISDFWSSSSSSIAGKSDSVQSPTHSYNRPQKSDTSKLNQLEKGTSVDVEKETSDPRPRKNKYRGIRQRPWGKWAAEIRDPQKGVRVWLGTFNTAEEAARAYDEAAKRIRGTFNTAEEAARAYDGTAKRIRGDKAKLNFPEPPSTPSPPAKRQCTSTIPDKTTLLESSDLMSEKPASIMLNYEYENQTPYYPMDMTAAEDPQHHDYELNEQISNLESFLDLDPDSSQFSGIVDSDPLNIFLMDDFAATQQQLFY	284
195	Niben101Scf10785g01014.1	NBERF195	MMKIIKSSTSSSANKSTKPRKNIGSNMSSNGKQTAEEQQNNCRYLGVRRRPWGRYAAEIRDPNTKERHWLGTFDTAEEAALAYDRAARSMRSNNNKSNKPIRTNFVYSDMPHGSSVTCMISPDEEYHHQFQLHQQQQLLVFDQADQNVAPTVNYTDFSHFSINKMNNISNGGGGGEDFALQQYDGNKATSTELPPLPEDITSSGNCYYFSEESDHQATQFPATSAISSVSDMGYSNNSTSLLNEMMPVSFGTNNEYQYGMTCGELGGGGSTITTTSGTTXKFWYKQ	286
196	Niben101Scf00163g22002.1	NBERF196	MASPQEKCTLDLIRQHLLDDVAFMDYYCSEPTTLYSQSSSSSDSLDQTFSFEPTLDYGNTSQNSSLEISSFFDHSKTECDWFEFETNSKVSAACSNLNSRKQTSFKGRKPSLNIVIPLKQQEVVQKVGISSESEKKHYRGVRQRPWGKFAAEIRDPNRKGTRVWLGTFDTALEAAKAYDRAAFKLRGSKAIVNFPLEVANFKQEYNNEIPQSANSGRKRVRGTEDEEQLAINKEMKREEERVHTAAAPLTPTSWSAIWDSGDAKGSFEVPPLSPLSPHMAYSQLVMI	287
197	Niben101Scf19266g00006.1	NBERF197	MAQNAIGDAALTLAIPAAENMKSGISKEIHYRGVRKRPWGRYAAEIRDSSKNSRVWLGTFDKAEEAARAYDAAAREFHGTKAKTNFPPPTVIKDSSPGPLNLNLGGGSSVGSGGSFTYLKQNNLNLGGGSSVGSAASFTYLKQNHQFPDFLAAGSSAPPSARDYQYLEALTGAEVSHGDPSSQRGTVAFLGGGDSVSGCGIQTESESSSVPNYNFADALTGAEVSHGDPSSQRGTVAFLGGGDSVSGCGIQTESESSSVPNYNFADVNQPTITTNCLNLDLNLPPPYNM	289
198	Niben101Scf03850g01005.1	NBERF198	MAANNVFEPLGSIIYNNNNYVSVPNDLGSSVYLRQIDLLQKFWEENRTKFTIPTTSTQTAYQNTSLYSKNYVCPSKKKLYRGVRQRHWGKWVAEIRLPQNRMRVWLGTYETAEAAAYAYDRAAYKLRGEYARLNFPNICDDTSKLGFGDSTQMNAVKNSVDAKIQAICQKVKRERAKKGVKKIVESDEKVEKNVDLDPSSCSSIVSNESGSNSDVISQSTSEDGLWKSENSPCSILDDCHVGTKNDDLNCHITSITHQFEMPMMELEFEDCSLTRMPSFDPELIWSILAN	290
199	Niben101Scf11424g01001.1	NBERF199	MAMKEKLNGGLKGRNVKTNGVKEVHYRGVRKRPWGRYAAEIRDPSKKSRVWLGTFDTAEEAAKAYDTAAREFRGPKAKSNFPLPSENQCPSNSSGPTESSSGETGVHAPHAPSELDLTRPLGTLAVGGDHGGCKSEVGLVRNGIPIFHHQPVMGVLTSDDSGVAESSSGETGVHAPLELDLTRHLGAVGEGGNHVRNGFPVFYQQPTVAVLPNGLPILLFDSTFVPTGVWNRQKPYRFEPVGVEFNGVSGRVVHSDASSSAAVKENHYGGGGVGRRELNLDLNLAPPMEA	290
200	Niben101Scf11706g00010.1	NBERF200	MFAGINREEEMSAMVSALTRVVRGEDKVLNQGEGNDIGAANSGVSPSLYSISGGVGEKRGREEQSGQQLLSDIRLSGGESSNIKTITSNTPTTESTFVYLTPTYEEGNINHQPRRRFRGVRQRPWGKWAAEIRDPYKAARVWLGTFDTAEDAARAYDEAALKFRGSKAKLNFPENVKLLPTSSTHEQPHYVENTSVSSFSNNYPIIHTQPNYYNNTNINPQIFLNDDFQRLQPPSSLLNQLQYLSSSSSSSSSSQLPFLPTMFFHGSQPTSQSSGSAFRATSSDSTYDHPSSSSR	295
201	Niben101Scf08840g00003.1	NBERF201	MKNTHTYIYIPINKRTHKHSIYIYIYIYMADQPADDSTKTSQKNQPPRPSESSQTPFCPIPPPLLPPQPVEETNISPRPLISNVTILENTKSPPKTLQLQNIIPTVTTTMSSTSSGGSPNRPTGRKHHVFRGIRSRSGKWVSEIREPRKTTRIWLGTYPTPEMAAAAYDVAAVALKGSDAVVNFPGNLTSYPSLPPSPSPGDIIKAAATAAALMKPQTGEGTMPTQPGNVNDQSSGNAQMMETGGDEYIDEEALFDMPNLLVDMAEAMMVSPPRMNSSPPSDDSPGNSDAESLWSY	296
202	Niben101Scf03773g00009.1	NBERF202	MEGKFSQSIKKCVVHKSINSKYENKLAPKVVRISYTDCDATDSSSDDDDYLEKKRVKKYVTEIRFEKKMSCGDVKKSSNLRQKKKKTVDLKTNENVKKFRGVRQRPWGKWAAEIRDPVKKTRIWLGTFETAEEAAMVYDQAAIQIRGPDALTNFMKPPLKKESVITSVSDYDSTGESENLCSPTSVLRHNDNNVGVTATKIVTNEETKDDRKRMEFVMQNDQNRILLDDNLPLMDQCFLKDFFDFRSPSPLMDDVLPAFCDDIDFPEVDFLDGNGILDEDLESCTWDVNDFLEDHCC	297
203	Niben101Scf04337g01005.1	NBERF203	MAEPTTPNSESESSSYNSCSLSSTISSSFVLIKNINSKNRLKRCREEEEENDGQTNMSKSSNSSTKKNGGNKSSDGSKHPSYVGVRKRAWGKWVSEIREPKKKSRIWLGTFATPEMAARAHDVAAMSIKGGSAILNFPQLVDLLPRPVTCSPRDVQAAAVKAAHMDHLNPTESSPAASMTSSSSSLSLVSGITSSSLCDDESTPAESEAEIPPPPPAAAILAPQHEELSEIVKLPKLDTSYDSVESTQEVLRFIESDWWDYGTNCEYYFGGENINVGFTTGLEAVVSNSFESFLWQN	297
204	Niben101Scf17051g00007.1	NBERF204	MVKETDGAATQSGVQRARNRYVGVRQRPSGRWVAEINDTIQKIRVWLGTFDTAEEAARAYDEAACLLRGANTRTNFWPCSLSNSSSASALSPKISNILLARLKEKNNSVASAAADDSSKSCSVPEIGRQQLNHQEKIGEDVSNFSDSLYADYLNYPDDHITGSNTIANVSATTTDFSSWADFIQPVNNFQSSNGEIIEVGNKEEEIGEASNTDVLEDIESNIDFQFLDEIGSSYYSPFEIAEELSSETMEHGMVYGEETSVVSEAMRRMNYERTFSASLYAFNGITECLKFKMKFGD	297
205	Niben101Scf00503g07005.1	NBERF205	MEGKFSQSIKKCVVHKSINTKHENKLTPKVVRICYTDCDATDSSSDDDFDDKERKRVKKYVTEIRLEKNLSCGDVKKSSNLRKKKKKTMDLKRNENVKKFRGVRQRPWGKWAAEIRDPVKKTRIWLGTFETAEEAAMVYDQAAIQIRGPDALTNFMKPPVKKESVITSVSDYDSTGESENPCSPTSVLRHNENNVGVTATKISSNEEMKDDRKRMEFVMQNDQNKILLDDNLPLMDQCFLKDFFDFRSPSPLMDDVLPVFCDDIDFPDVNFLDGNGVLDEDLESCTWDVNDFLEDHCC	298
206	Niben101Scf00546g00002.1	NBERF206	MAKTSKSNQKNTSHSKNSDKNNSNSGGSGDHALTKGKRKRKAVVPRDSPPQRAYSDEEAAAHAYDLAALKYWGQDTILNFPISTYEKELKEMEDQSREEYIGSLRRKSSGFSRGVSRYRGVARHHHNGRWEARIGKVFGNKYLYLGTYATQEEAAMAYDMAAIEHRGPNAVTNFDLSRYIKCNPKLKSIPNSTDLNPIPNTKEEIDSNFIHQQHEQQESSNSAGITVPPPHAVGVTAASSVVDCPGTPPEPDRPRRSFPDDIQAYFNCHDSSSFVEEHDIIFGDFDSFVLPMFAYELNT	299
207	Niben101Scf02437g08005.1	NBERF207	MVKPNGKDSCENSPSSSSSSSKYRGVRKRKWGKWVSEVRLPNSRERIWLGSYDTAEKAAKAFDAALFCLRGKTANFNFPENPPEIVNGRSMTPAEIQVAAAQFANSDSEPRVSNWVNPRDNSDPSSSSSDMYCAESPSVSVSNGLVGLESEKTEMTLDNGFVDMFSSMGTTNDMSDFGIFPGFDDLSGEYYVPPLPNLDNTAEENYMNYDEFHLQGSSPSVSVSNGLVGLESEKTEMTLDNGFVDMFSSMGTTNDMSDFGIFPGFDDLSGEYYVPPLPNLDNTAEENYMNYDEFHLQGSSFLWNF	305
208	Niben101Scf03732g03003.1	NBERF208	MEINFQKQQQKEAKVTKMKVRNIRSNKFVGVRQRPSGRWVAEIKDTTQKIRMWLGTFETAEEAARAYDQAACLLRGSNTRTNFVTRVSADSPLASRIKNLLNSKKTAKQKSHDQKEQSSSQNTSSVTSNNSNNSSPMITPSYFDDSVSSQNITPIHPPEHPTQIEDYIAYDQTTFSCNQEVQVQESQLFDDTYKPDLSNCSDEFDVGYSSSSASDSFSFTNSSQHEMSWNFARGYEFAQEFLDHPKNVILDETAEMGLTEFERMKMERSISASLYAVNGVQEYIENFYDPSEPLWNLPPLCSLLC	305
209	Niben101Scf15962g00025.1	NBERF209	MAGTETTKTNTNTTKSSPEPNKSISRKFVGVRQRPSGRWVAEIKDSSQRVRLWLGTYDTPEEAARAYDEAARALRGENARTSFASNTLSNPNSNHDQSINMLQSNDSKHGLSFSSLKAKLSKNLHSIMARNSENKSSASKNRVSDHFTFARIFHFKNNCHQYQSQHMGMKKIEKVVQPSIRVLPHVTDNNNNNDLSSWENSSVSDCSSEWAAFRQLGLDSDNGSSDASEYFLGSDPMAGWVSSPDIMSSSSEGSRSKRFKVSSSVMVPPTFSVLLINSSVAEVDRESRKNNRKQKTWLENNHVVFYVA	308
210	Niben101Scf01818g07006.1	NBERF210	MNIIKSSTSSTNKSTKPRKNIGSNVCSTQNGKQNAEEQHNNCRYLGVRRRPWGRYAAEIRDPNTKERHWLGTFDTAEEAAVAYDRAARSMRNNNKSNKPTRTNFVYSDMPPGSSVTCMISPDEEYHHHHHLQQQQQQQLLVFSQVENVSVPAVDYTDFSQFSISSTNNGGDSGGGEFALQQYYNPNYNVHMEESYSGKCYYFSEESNNQGAQFPAISSVSEHMGYSSSNSTSLLNEMIMPRSFGTNNEYQYGMTCGELGGGSTITTTSCTTTESYNGFGFDDCLQPLQYCSSNIMQDESNNTTLDYWFS	309
211	Niben101Scf01818g08019.1	NBERF211	MNIIKSSTSSSANKSTKPRKNIGSNVCSTQNGKQNAEEQQNNYRYLGVRRRPWGRYAAEIRDPNTKERHWLGTFDTAEEAALAYDRAARSMRSNNNKSNKPIRTNFVYSDMPHGSSVTCMISPDEEYHHQFQLHQQQLLIFDQADQNAAHTVNYTDFSHFSINNISNISNDGGGGEYFALQQYYNSNNDVHMEDGYRYDSNNATSTELPPLPEDITSSGKCYYFSEESNNQGAQFPAISSVSEHMGYSSSNSTSLLNEMIMPRSFGTNNEYQYDMTCGELGGGSTITTTSCTTTESYNGFGFDDCLQPLQYCS	313
212	Niben101Scf23241g00003.1	NBERF212	MECFDEYFALEKIRNHLLGDFSPKTLKFGAELTSNKPCSDIMTESSSSSDPFPFHFLSDSFDFEADFFQFGTEVSNSSSESANSVHISNNFIKLESEPTISSSEYEKSQVIIDLTSPKLSKVSDRKPSLKIDLPPVKKFEWIGFGNSTAQSNSIVSVTMQQKRKTEEKRHYRGVRQRPWGKYAAEIRDPTRRGARVWLGTFTTAVEAAKAYDRAAFKMRGSKAILNFPLEVGKNLSYASSAMDGGVKRHRESEERVEEKEVKKVERCKEEQSWPLTPSSWNFLCEQNTNGMLNLPPLSPLSPHPPLGCSQLIQI	314
213	Niben101Scf02475g08017.1	NBERF213	MEINFQKQQQKAAKVTKLKGRNNRSNKFVGVRQRPSGRWVAEIKDTTQKIRMWLGTFETAEEAARAYDQAACLLRGSNTRTNFVTRVSVDSPLASRIKNLLDSKKIAKQKSHDQKEQSSASSTTSSHNINQNTSSMTSNNSNNSSPMISTSYFDDSVSSQSIEPIHPLEQPTQVEDYMAYDQTRLSCNQELLLQESQLFDDTYKPDLSNCSDEFDVGYSSSSASNSFSFTNSSQLEMSWNFARGYEFAQELLLDHPKNVILDETTEMGLTEFERMKMERSISASLYAVNGVQEYIENFYDPSEPLWDLPPLCSLLC	316
214	Niben101Scf08141g01011.1	NBERF214	MEISSLDQFPNFDFLQDQFPWEFEYSELINNYVHHIPRSSLFSKTNSSKGSREEGFEKDRISLPAHPLNEVERDKRTPSFSQRRQVSIFDKIPRSSSSLESNSSKGSSDEGSEEDRTDHPSHPTEIECGEKIPPFSRKGQINIIGHVPRSSSSSETNSSKGSSADEEVISYSIKRKDADTDKKELKDEEKHYIGVRKRPWGKYAAEIRDSTRNGIRVWLGTFDTVEEAALAYDQAAFSMRGPLAFLNFPMEKVKESLQNINMNSIQLLDGLSPAAALKETHKMRMKNVKRRRNRKKKKAVLVFEDLGADLLEELLMS	317
215	Niben101Scf01237g06003.1	NBERF215	MAVLDQASNMISLPLDYARKRTSRNRKDAPKNVAETLTKWKEVNEKLESSDDGKKPVRKVPTKGSKKGCMKGKGGPENGRCRYRGVRQRTWGKWVAEIREPHRGRRLWLGTFDTAVEAALAYDEAARAVYGPCARLNLPNYPSSNESTKDDSSWNTFELNKEETKDEAKGVLDNSEVVEIKEEPIAFDYDSMKSGQDNNLDNFCFDDEMFDVDELLVVLDSTPLDALAPNHVSGSIPLDQDQYAHDHSYRLQRSSYDNNQFSNTLYQLQNTDGMSIDPIPLIVRMPPHCDSISVAIEDENFPRVEEIIPIRKKLGPTF	318
216	Niben101Scf05993g01013.1	NBERF216	MDERNSIDPLVSCNSAPSKVQPPLQLPAQLVELDFHSVLQFPAVYTLSSCAPRGKGGPQNALCEYRGVRQRTWGKWVAEIREPKKRTRLWLGSFATAEEAAMAYDEAARRLYGPDAYLNLPHMRANFNPLNKSQKFKWFSSGNFVSSFPNCTTGLLNLSAQPNVHVIHQRLQELKKTEASSSSSSISDPKNELHNFSKQPHLTIPQVKEKEVEFSSQNKSVVQEKPQIDLNEFLQQLGILKRDDDKADKSHDHRISCFIESEVSLKDDSSVANFFADASYNWDTLGAITGIDDHDQAEETSSFIDAYNVNDELMFPSSIWNF	322
217	Niben101Scf05357g00008.1	NBERF217	MNTSPNAQHLIPSLTVPIPSEEKATTISSATVSDTTSTSTSSNSNKKSKGKGGPDNNKFRYRGVRQRSWGKWVAEIREPRKRTRRWLGTFATAEDAARAYDRAAIILYGSRAQLNLQPSTGNNSSSSSQSKKSSSSSSTQTLRPLLPRPSGFGITSFSSPNTAPPVSNSVAAGCGYVPYGFFPTVQYSQQLVQPHHQQQQHYAICHGYGPEVDNLALEAGTTCSYSSPNPNPSHNQDKPPKQEDQSSHHDYQSQQQNCLYDETINPFVGSSMSFCSTQTMAAPVVSDPVVVMGGPGSPGFWPTNDDTNYPASNFWDYSYDSFMFDF	326
218	Niben101Scf06984g02002.1	NBERF218	MSTSPKAQHLIPSQTVPITSEEKTTTISSATVSDTTSTSTSSNSNKKGKGKGGPDNNKFRYRGVRQRSWGKWVAEIREPRKRTRRWLGTFATAEDAARAYDRAAIILYGSRAQLNLQPSTVNNSSSSSQSSKKSSSSFSTQTLRPLLPRPSGFAFTSFSSPNTAPPVSNSVGAGCGYVPYGFFPAVKYSQELVQPHQQQQQYAICDGYGPEADNLAHEAGTTCSYSSPSPNPSHIQEKPPKQEDQSSHHEYQNQQQNTLFGETINPFVGSSMSFCSTQTIAAPVVSDPVAVMGGPGSPVFWPTNDDGNYPAVNFWDYSYDSFMFDL	326
219	Niben101Scf00577g11004.1	NBERF219	MFEPQKQPQKSKNRVETGQPMRKIRIVCNDPDATDSSEDERVNDIKPTLKRFVREINLPIGNISSKKVKVKIPVETTEISCQDSNNGEKNPRKNRVLAKTLSSNQQRLSPGKYRGVRQRKWGKWAAEIRDPFKGRRVWLGTYNTAEEASLAYETKRLEFDSMAKNINNSSSNVSEKSSNNEENSAESLVSHASHTSPASVLEMDWLTSASEVNDIKHDDEKAKVELGLMEDSLSLAEIGAGMEFDIEMDLFFAGSDDFGQNLDDFVVNDFEDLPIYGLEGDEQLPTGLPDFDFDFDFDGYNESCAWMDDTTAAPLMNGTTPLNIALCP	328
220	Niben101Scf01177g01001.1	NBERF220	MKERLVSTSDSTSSTKFSEFFPLTFLQNDQGNNNIIPLNNFLESFHHHNQVSDHQTCSSPTSLSSNYPTLGLFLKEPSILEISKRAEESVNNKSHNQIHQQQQAAATTSTTNWLKMNQTLTNCTTTKGFSDYWLSTTKTQPMKITTRSRKSSLHFNQGNQKSSSSSSSLIAMSQGKLFRGVRQRHWGKWVAEIRLPRNRTRVWLGTFDTAEEAAIAYDTAAYILRGDYAHLNFPHLKHQLKANSINGNTAALLEAKIRAISSQTKKDNDHDQATKEVGLATDDSRIKNVMSQNQEMENSEKKVKNINQERLLSGNDIDGVQLSRMPSLDMDMIWDALLVSDSS	343
221	Niben101Ctg15705g00004.1	NBERF221	MSNKERVNDGCVGSVRKVRIIYDDPDATESESENDDNTCNVVRIKRIVKEINVSSASLEKKDFEKCPIRSSNKSLENKNRNGLENKRVQIKSSSLPKGVRMRKWGKYAAEIRDPSQGKRIWLGTFDTVKAAAEAYDAKKAEFDRRILSERGKNLSSPQAPPECSTACSSHPTNRTSSLYSHPSPSSVLDVPNSSAAAAVECIDIPMKDKNPVPVLEVEQPAVECIDILDFNPKFEDQMLYKDPLIEQGTISNSLAEMTEFNITKKTKARQPTIKICQKSTKGIEDRHLNCTDQSITPPSISAELNMMNFEETAVSGNNLKLLGFDENALFGKDFSQTFDPYTDFV	345
222	Niben101Scf12639g00001.1	NBERF222	MSSSSTPSSENINQLPFSMFEPIRTPTGYSWLQRNTAVCQPSEKRGRRKQVEPGRFLGVRRRPWGRYAAEIRDPTTKERHWLGTYDTAQEAALAYDRAALSMKGTQARTNFIYTCDNNNSFSSLISPFDNVQNFLQPNSHFNFKNATTQNNNKNVITTTTSDNETSNNSHDSYSSYGSSPNENNSFFLSPSHENSGYLDCIVPDSCLKPPPSSTPQSKMTTKNSQENSNIDHHQNYMTTFSKNPSNFLFNSGFWDGDDQEKYTSSWENSCELSAMMMNNNIMSSSSEINGNNINEMVDVGNCYYSSMEIDRDNMMVQPSEITTNTTTTTSSVFQRFGDVEFGYSLF	346
223	Niben101Scf01295g05006.1	NBERF223	MSSSSTPSSENINQLPFGMFEPIRTPTGYSWLQRNTAICQPSEKRGRRKQAEPGRFLGVRRRPWGRYAAEIRDPTTKERHWLGTFDTAQEAALAYDRAALSMKGTQARTNFIYTCDNNNSFPSLISPFYSVQNILQPNSHFNFKNAPTQNNNKNVITTTTSDNETSNNSHDSYSSSPNENNSFFLTPSHENSGYLDCIVPDSCLKPPPSSTPQSKMITKNSQENSNIDHHQNYITTFSENPSNFSFNSGFWDGDDQEMYTSSWENSCELSAMMMNNNIMSSNSEINGNNIKEMVDVGDCYYPSMEINAAFDHDNMIVQPSEITTTNTTTTSSSIFQPFSDVEFGYSLF	348
224	Niben101Scf06378g04004.1	NBERF224	MAILDQASKMTSLPLNCSRKRKSRSRRDGTKNVEETLAKWKEYNQRLDCVDDNGKPVRKVPAKGSKKGCMKGKGGPENSRCNYRGVRQRTWGKWVAEIREPNRGSRLWLGTFGTAIEAALAYDEAARAMYGPSARLNLPNYPSSKESSKDDSSWATTSASDSTAASSLCEADELKGISEIKFEDGEGESIIDGVTTDIHETSTPLTSEKHEATSKMGIVEAKESIDQDMLKSGRDYLDNLNWDEMFDVEELLGMLDSAPADAPGFMQDLDSIAGQKEQYAYSNNQLSNSSFQQQNADDKLLGGTQQMEQQAPIAVDYGFDFLKPGREEDLNFSLDDLALMDFDSELGV	348
225	Niben101Scf05440g02002.1	NBERF225	MNWQRDNGKDFNTSFEKKIKRPEHQLCFQSSVSSSHQTLLQSSVPYSTPTHTAFSPPPLSSSTSRSSRVVFPFALDGTQQSIESLHQLRSNSTPLFRPMHQNQQQMISFSAQHPQSMELGPFQHQLQQCNETLHLSPRGTTMMLNKSGQNNRVPLFSPLLQHPYSTTKLYRGVRQRHWGKWVAEIRLPRKRTRLWLGTFDTAEDAAMAYDREAYKLRGENAKLNFPELFISKHKVAISSSPTASHESALPGIEMQLAPLPPSECGNFEEETGSEVIANDGVQSNVENCGALTQLSDFEAWLNAIPEGWGPGSPVWDHLDTNNNLILSHTINLGDVHQQKPHNSDLEGTTKPLG	353
226	Niben101Scf01817g01001.1	NBERF226	MDQQTMLSSRVKYTEHRKQTTMVKPSVPATVTGRRKCPEMNAANVGPRVVRITVTDADATDSSSDEGEGLYGRHRVKKFVNEVRIEPCMGETVKSNGSDNGSVSGVLRNGSSESGIAPKRRKKNAGATKAEATAARGLKANNVKKFRGVRQRPWGKWAAEIRDPLRRVRLWLGTYDTAEEAAMVYDHAAIQLRGPDALTNFAIPPPAKTASCSSGYNSGEESHNDQRSPKSVLRCASTSFEESQNNEEAEAESIPSVPSESAQKISDFRDENDISYFCEFLPFESSFPDDLFPFENPVLIPGFFEPAALPDNVFGEICNDMFIGSSNDFGFGSSSWPEDDYFQDIGDIFGSDPLVAL	357
227	Niben101Scf03985g01005.1	NBERF227	MDQQTMLSSIVKYTEHRKQTTMVKPSVPATVTGRRKCPEMNAANVGPRVVRITVTDADATDSSSDEGEGHYGRHRVKKFVNEVRIEPLIGETVKSGGSSNGNGSVSGVLRNGSSETAVAAKRRKKNAGATKAEVTAARGLKANNVKKFRGVRQRPWGKWAAEIRDPLRRVRLWLGTYDTAEEAAMVYDHAAIQLRGPDALTNFASPPTAKTTSCSSGYNSGEESHNDQLSPKSVLRCDSTSFEESQNNEEAEAESLPSLISESAHKNSDFRDEIDISNFCEFPPFESLFPDNLFLFENPVPIPDLFEPAALSDNIFGETCSDMFIGSSNDFGFGSSSWPEDDYFQDIGDIFGSDPLMAL	359
228	Niben101Scf01980g04003.1	NBERF228	MAATMDFWTSTLLDLNSSNSLQGGGELMEALAPFIKSASPINYPPVSPSFSFPSTNSQSFPISTTTSSTSTSYPYDSFSLTSHPNMSYDGCSTSTTINPTFSQGFSGIEMEQPSSIGLDQLTQAQVHQLQAQIYLQNNHQQKQMMSPAATFQDSLSQQHNHHASFLGPKPVSMKQSGSPPKPPKLYRGVRQRHWGKWVAEIRLPKNRTRLWLGTFDTAEEAALAYDKAAYKLRGDFARLNFPHLRHNGSLIGGEFGEYKPLHSSVDAKLQAICQDLAQGKSIDTKKKRKVSSKKEESKKAEVGSESDGSGSGSGFGSGGSSTVSDVTFTEFADEDSIWDMCSENFMLQKHPSHEIDWASLL	361
229	Niben101Scf06119g02002.1	NBERF229	MAATMDFWTSTLLDLNSSNSLQGGGELMEALAPFIKSASPINYPPISPSFSCPSTYSQSFPITTTTSSTLTSFPYDSFSLTSPPNMTYDVCSTSTTINPTFSQGFSGFEMEQPGSIGLDQLTQAQFHQLQAQISLQNNHQQQQMMSSAATCQDSLSHQLTHHASLLSPKPVSMKQSGSSPKPPKLYRGVRQRHWGKWVAEIRLPKNRTRLWLGTFDTAEEAALAYDKAAYKLRGDFARLNFPHLRHNGSLIGGEFGEYKPLHSSVDAKLQAICHDLAQGKSIDSIKKRKVASKKEKSKPAEIGSESAGSGSGSGFGSGGSSPISDLTFTEFAEEDSIWDMCSENFMLQKHPSHEIDWASLL	361
230	Niben101Scf10283g01004.1	NBERF230	MAAAMDFWNSSSVDVRSTSESIITSGGELMEALEPFMKSASSSPSISTPFPSSDFHSFPSFPPPIPSPTSTISYPCTSFYQTAPQPMGSESCSTSTTENTQIFSTGFSGYGMEQLGSIGLNQLTPAQIQQIQAQINFQTQQQQQQMMFHNGSHHHTSTMNMLGPKPVQMKQSGSPPKPTKLYRGVRQRHWGKWVAEIRLPKNRTRLWLGTFDTAEEAALAYDKAAYMLRGDFARLNFPHLRHNGSLIGGEFGEYNPLHSSVDAKLKEICESLAQGKSIDSKKKKASNVSSAAAVVKMEEEESKVAEGGSEGSGSGSGSGGSSPVTDLTFPEFTEEESTWDMCSENMLLQKYPSHEIDWASI	361
231	Niben101Scf10169g00004.1	NBERF231	MAILDKASNLMSLPLDYTRKRKSRSRKDAPKNVAETLAKWKEVNEKLESSDDGKKPVRKVPAKGSKKGCMKGKGGPENGRCKYRGVRQRTWGKWVAEIREPHRGRRLWLGTFDTAIEAALAYDEAARAMYGPCARLNLPNYPSLNESTKDDSSLPTISQSDSTTASSLTETNIPKIKFEDRESKARSDGERSVFYEARTPSSSIKEEAKDEAKGVLDDSEVVEIKEEPIAFDYGSMKSGQDNNLDNFYFDDEMFDVDELLGVLDSTPLDTLAPNQVSGFVPLDQDQYAYDPSYRPQNAAYDNNQFSSPSCQLQNTDVETFEDLQQMQQQAPIVGDYNFDFLKPGRQEDFNFSLDDLGFLDIE	362
232	Niben101Scf02219g02002.1	NBERF232	MAAAMEFWNSTSVDVHSTPEPIITSGGELMEALEPFMKSASSSPSSNFPPSISTPFPSSDFHSLPSFPPPLPTPTSTISYPCTFFYQTAPQPMGSESCSTSTTENTQIFSTGFSGYGMEQPGSIGLNQLTPAQIQQIQAQINFQTQQQHQMMFHDGYHHHASTMNLLGPKPVQMKQSGSPPKPTKLYRGVRQRHWGKWVAEIRLPKNRTRLWLGTFDTAEEAALAYDKAAYMLRGDFARLNFPHLRHNGSLIGGEFGEYNPLHSSVDAKLKEICESLAQGKSIDSRKKKTSKGSSAAALVKMEEEESKVVEGGSESDGSGSGSGGSSPVTDLTFPEFTQEESTWDMCSENTLLQKYPSHEIDWAAL	366
233	Niben101Scf08278g00007.1	NBERF233	MDHYMLCPIKYTEHRNVIRKVTKPSRVKSKKFPEPQKSNQYNRFVPPKTVWISVTDPDATDSSSDEEDELFGRRRVKKYINEISIETAVKCEVSMPTNGKTAVKKRAADVLQPKQKPMKVKEVQPLQSAGTVKKFRGVRQRPWGKWAAEIRDPARRVRLWLGTYDTAEEAAMVYDNAAIKLRGPDALTNFITPPRPEIDVPSNSGYESGNESRNIPSPTSVLRFIMSQSSEETEQQSRSEPVQEECPSVQGPMECEQPVQDFEPVQNVELFGLPVKQEMEECQGETSMIPDYSNAYLPIDVPFLEDFFNFEAAEQTLFEDTTTGFPNDFGTSYNATSSSDFMNDFLFNDDFYNFYDSFQDLGTSSD	366
234	Niben101Scf08060g00005.1	NBERF234	MSSDYSERNQKMAILDQAPKMTSLPLDCSRKRKSRSRRDGTKNVEERLAKWKEYNQKLHCVDDEGKPVRKVPAKGSKKGCMKGKGGPENSRCNYRGVRQRTWGKWVAEIREPNRGSRLWLGTFGTAIEAALAYDEAARAMYGPCARLNLPNYPSSKELSKDDSSWATTSASDSTAGSSLSEVCPAGELKGFSEIKFEDGEGESRTDSATTAIHEAGTPLSSEKHEAKSKMGVVEAKEEPRSIESIDHDMLKSGQDYLDNLNWDEMFDVEELLGMLDSAPAGAPSFMQDFGSIAGQKEQYAYNNNQLSNSSFQQQNTDHKLLGGTQQMEQQAPIAVDYGFDFLKPGREEDLNFSLDDLALMDLDSELGV	368
235	Niben101Scf03045g14001.1	NBERF235	MQDVIKPLQTNISSTLFKRCGNNKRPLNDRATGGGCGATMRYRGVRRRPWGRYAAEIRDPQSKERKWLGTFDTAEEAACAYDCAARAMRGVKARTNFVYPPPAHPTTITTDSFLNMPLLNYTSTKAANRYHQLCLKDLPIRQFFQSSPQKSGGDVAGKTALEQSNDSLNLLLFHEILNSSSDLSLSSNTDLNMNINITPFDEQLPLMFDRNNTTSGATFAGSSSSSLVNQSCLISAPKATSYSISSFAPMTPQKVKDDQTNNSSSVDSSMDFFPTVTSDSGFLEQALNGFFPKPTPMSSDDICAKKSNEDVKNHLGFCIDERGAAGISQLSSLPIIDQDFPVNMDQLSAENLLGDMSFHYSDLLNILAAKMENS	374
236	Niben101Scf00870g05003.1	NBERF236	MCGGAILSDLVPPSRTSRRLTADLLWGTSDLSKKKKNPSNYHSKPLRSKFFELDDEFEADFQDFKDYADGVDEVKAFAFHGSKSVKSDDSGCDADKSSKRKRKNQYRGIRQRPWGKWAAEIRDPTKGIRVWLGTFNSAEEAARAYDIEARRIRGKKAKVNFPDEAPVSSSRRVVKLNPQEALHKESSNIVQANTTFTNNLGCGSDDSLSFVEEKPTAMQYGYEDVSFTAGDMGLSSFSPSAGTNVYFNSDEGSNTFDCSDFGWGEPCSRSPEISSVLSAVLECNETQFDEDARPEKKLKSCSDNSLPDDGNTVNKLSEELSAFESQMKFLQIPYLEGNWDASVDALLNADATQDGGNAMDLWFFDDVPSLMGGVY	375
237	Niben101Scf01543g03001.1	NBERF237	MDHSMLCPIKYTEHKKTIRKVTKPAFIKLKKITETRKFSEYIPTIPRTVRLSVTDPDATDSSSDEEELFGRKRVKRYINEISIETSPINDVKPLNRGKAIKKRAAEASTPKQKALKVKVVQPPPDGTVRKFRGVRQRPWGRWAAEIRDPARRVRLWLGTYDTAEEAAMVHDNAAIKLHGPDALTNFITPPTKPEEVNVASNSGYESGDESHNLSSPTSVLRFRTSLSSEEAEQQSGSEPILEETNGDVCCPLVEEEPVLDSMDNSDQTVEHFECQGETSMLIPDYSNDYLPTDVPFLDDFFNFEAAEQTLFDETTSFANDLCTSYDDVSSWNFANDLLLDHEIVKLEDSFEDLGSLEVDNYFSDIGDFSSVDALLAL	377
238	Niben101Scf03510g06011.1	NBERF238	MAAAIDIYSNDSSVFSDPLSEELMKALEPFMKGASCSSSISPSLSPCSSSSPSTSSSSSSFYPFGEPNLYTDFCTIPSLSFNPMGHVAETGSIGLNHLTPSQIFQIQAQIEFQNQQQQQQQLLLQQQQSLGLLPTTPTYSKNLNSMNYLGLKPVPMKQSGGAIQKATKLYRGVRQRHWGKWVAEIRLPKNRTRLWLGTFDTAEEAALAYDKAAYKLRGEFARLNFPHLRHQLNNELSDFKPLHSSVDAKLQAICQNLANSDGLSCNNNTDSKPRKSKXQAICQNLANSDGLSCNNNTDSKPRKSKKAASKLDAVQDCPENVSVKIEATSSCSPTPSEESSSSPESDITFLDFIEPSFDESENFFLPKYPSVEIDWAAL	378
239	Niben101Ctg15705g00001.1	NBERF239	MPCLPQELFDMMSNKERVNDGCVGSVRKVRIIYDDPDATESESENDDNTCNVVRIKRIVKEINVSSASLEKKDFEKCPIRSSNKSLENKNRNGLENKRVQIKSSSLPKGVRMRKWGKYAAEIRDPSQGKRIWLGTFDTVKAAAEAYDAKKAEFDRRILSERGKNLSSPQAPPECSTACSSHPTNRTSSLYSHPSPSSVLDVPNSSAAAAVECIDIPMKDKNPVPVLEVEQPAVECIDILDFNPKFEDQMLYKDPLIEQGTISNSLAEMTEFNITKKTKARQPTIKICQKSTKGIEDRHLNCTDQSITPPSISAELNMMNFEETAVSGNNLKLLGFDENALFGKDFSQTFDPYTDFVGLDSNFLCCDGLEEFVYGMNEDF	379
240	Niben101Scf12210g08011.1	NBERF240	MCIYKVANSNRRRHEDRDDNYNVLESMFSGNINREEEMSVIVSALTHVVAGEDRRRVINNQVLLADESGAAENNFGSGFSSVTWGVGEKRGRNEEQKGRHFLHIGTSHIRSSGGEGTSIRTITSSTPATEATFIYTSTNDHQNSSSDQSSGGDNNNNQARRRYRGVRQRPWGKWAAEIRDPYKATRVWLGTFDTAEAAARAYDEAALKFRGSKAKLNFPENVKLLSSPIFSDFPNTLYSISSSPDPIVHTSLYRPNFIEYPLRDDEPIVHTSQYHSSFIDRPPTDEPILHTTHHQALNNSTDLNDQTFTNEFHRLHLPYFPNMFLSPIQPQVHIQLDASQSEPVTEALAPPLSQSSRSNFQTASNWSNLVYDHPSFSSG	379
241	Niben101Ctg15010g00002.1	NBERF241	MIQQQIHQEADYLLSTSSTMPMFTGYSQTREMSTMVTALTHVVLGHSYRPDISGSVTSSFGGGGSGIYSAYSPSSAYSSSSSGSRAGQKRSQEATSLVAPSNTTISTITTVPAFTTTTTTTTTTTTTTTTTTTTTTTTTTTAAAGGSTEETGGERRRRYRGVRQRPWGKWAAEIRDPHKAARVWLGTFDTAEAAARAYDEAALRFRGNRAKLNFPENVSRLLPQLQASQPTTRLAISSSSTSASSQLPFMAPISQPTALFQPHHHHHQPIQSSDMIRDYWEYSQLLQNPGDFFDQQQPSGLLEQMFFASSRAILHSNTSSSLSNSAASSPSYPLLFSGQQSSYYRPQTNQIQGGGSSSSSSSNISASFWSSSSHYPPSSS	380
242	Niben101Scf00278g05001.1	NBERF242	MDHDMLCPIKYTEHRNVIRKVTKPSPVKSKKFPEPQKSNQYNRSVPPKTVRISVTDPDATDSSSDEEDQLFGRRRVKKYINEISIETAVKCEVSMPASGKTAVKKRAADVLQPKQKPMKVKEVQPPQSVGSVRKFRGVRQRPWGKWAAEIRDPARRVRLWLGTYDTAEEAAMVYDNAAIKLRGPDALTNFLTPPKPEIEVPSNSGYESGNESRNIPSPTSVLRSRMSQSSEETEQQSRSEPVQEECPSVQGPMECEQAVQDVEPFGLPVKQEMEECQGETCMIPDYSDDYLPTDVPFLEDFFNFEAAEQTLFEDTTTGFPNDFGTSYNDISSSGFVNDFLFNDDFGNFDDSFQDLGTLGVDDYFQDIGADFSSVDSLLAI	380
243	Niben101Scf00530g01001.1	NBERF243	MDHDMLCPIKYTEHRNVIRKVTKPSPVKSKKFPEPQKSNQYNRSVPPKTVRISVTDPDATDSSSDEEDQLFGRRRVKKYINEISIETAVKCEVSMPASGKTAVKKRAADVLQPKQKPMKVKEVQPPQSVGSVRKFRGVRQRPWGKWAAEIRDPARRVRLWLGTYDTAEEAAMVYDNAAIKLRGPDALTNFLTPPKPEIEVPSNSGYESGNESRNIPSPTSVLRSRMSQSSEETEQQSRSEPVQEECPSVQGPMECEQAVQDVEPFGLPVKQEMEECQGETCMIPDYSDDYLPTDVPFLEDFFNFEAAEQTLFEDTTTGFPNDFGTSYNDISSSGFVNDFLFNDDFGNFDDSFQDLGTLGVDDYFQDIGADFSSVDSLLAI	380
244	Niben101Scf05827g07015.1	NBERF244	MCGGAIISDCIPPTRSSRRLTADLLWGCSDLNQKKNPFSYEYSKPLRSEVADLGIDFEADFQDFKDCSDDEEDSYKVDGLKPFAFSAPEQSGASVGSKSLKSVDSDMEVEKSSKRKRKNRYRGIRQRPWGKWAAEIRDPQKGVRVWLGTFNTAEEAARAYDVEARRIRGKKAKVNFPDEAPVPASRQAGTVNPRKESSNPVLSNTTSVKKLDDGYYYNPGFFEEKPTKKLGYEDLCPTPGPNSFAPPAAACVYFSSDQGSNSFEPSDFGWGETCSRTPEVSSVLSAAVESHEAQFVEGACAEEKIESCSNMSVPNDGNTAPKLSEELSTFESQMNFFQTQQSEGNLDASVDAFLNADATQDVENEMDLWFFDELSSLVRGVY	382
245	Niben101Scf05140g01007.1	NBERF245	MQWSTNIRAKQESSYDNHRHHLPPPRLTAEQEFSVMVAALKNVITGNATPIHANSELNSFECFQNVISTPSFSSSPSTSMSSFEPPLLRVIDEPEPCNFCRIKGCLGCDYFGATITTDNNNINNNKTKKISVVKQKKKNNYRGWSTNIRAKQESSYDNHRHHLPPPRLTAEQEFSVMVAALKNVITGNATPIHANSELNSFECFQNVISTPSFSSSPSTSMSSFEPPLLRVIDEPEPCNFCRIKGCLGCDYFGATITTDNNNINNNKTKKISVVKQKKKNNYRGVRQRPWGKWAAEIRDPRKAARVWLGTFLTAEEAARAYDRAAIEFRGPRAKLNFSFSDYTLIQEQSTPSSSPQNQQPESKFEQGNADVKMGMSKLDSDFWDQ	385
246	Niben101Scf19733g00001.1	NBERF246	MCGGAIISDYIAPSRTSRRLTAELLWGRSDLSKKQKNPTDYHSKPLRSQVVDLDDDFEADFQDFKDFSDDEEVEVDVKPFAFSASKTFEGSKSVKTVYSDKDADRSSKRKRKNQYRGIRQRPWGKWAAEIRDPRKGVRVWLGTFNTAEEAARAYDVEARRIRGNKAKVNFPDEAPVPASRRTVKLNHQKGLPKESLDSVQPDSTIMNNMEDGCYDSLGFLEEKPMTKQYGYEDGRSTSGDTGFGSFAPSAGTSIYFNSDVGSNSFDCSDFGWGEPCARTPEISSVLSAAIESNESQLVEDDASPMKKLKSSPINPVADDENTANKLSEELSAFESQMKFLQIPYLEGNLDASVDTFLNSSATQDGENAMDLWSFDDVPSLMGGVF	385
247	Niben101Scf05123g02008.1	NBERF247	MCGGAIISDYTAPSRTSRRLTAELLWGRSDLSNKQNFFNNYHSKRLRSQVVDLDDDFEADFQDFKDFSNDEDVQVDVKRFALSASKNSTVEGSKSMKTVDSDKDADRFSKRKRKNQYRGIRQRPWGKWAAEIRDPRKGVRVWLGTFNTAEEAARAYDVEARRIRGNKAKVNFPDEAPVPASRRIVKVNPQKVLPKESADSVQPGSTVMNNMEDGCYDSLGFLEEKPMTKQFGYEDGSNASGDTGFSSFAPSAGTDIYFNSDVGSNSFDCSDFGWGEPCARTPEISSVLSAAIESNESQLVEDSASPMKKLKSSPIDPVPDDGNTTNKLSEELSAFETQMKFLQIPYLEGNWDASVDPFLNPSATQGGENAMDLWSFDDVPSLLGGVF	387
248	Niben101Scf08050g00012.1	NBERF248	MEDAMRRLNQESDLPLQTTTCTTKRSCGANKRSLKDGGGSSVGAVRYRGVRRRPWGRYAAEIRDPQSKERRWLGTFDTAEEAACAYDCAARAMRGVKARTNFVYPPPPTQPTSTNDGLTFLNIPNSFNYTKSFPYQAALKDLSNRQFFHSSNYSPSYGSGIKGVNGSTVATATQKSNDSLNMLLFRELLSSNSSNTNTTSLSSDTGFNNNNMPLYEQLPLMFSRYNTSIGLNSSTSNLMNSSTFLPTTSNEIIPSSSVMTLPKIENVHSLNNNSSCVHDESGMDFFPSEPSDSGLLEEALNGFFPKPKPVKSESFLSSTKGELSGVCNIPQQINDGLNSGFGFSQPSSSFPMYHQDFAANLPVSSGDNMMGDIFQYPDLLNIFAAKLQNS	390
249	Niben101Scf02720g08001.1	NBERF249	MEDAMRRLNQESDIPLQTTICTTKRSCGANKRSLKDGGGSSVGAVRYRGVRRRPWGRYAAEIRDPQSKERRWLGTFDTAEEAACAYDCAARAMRGVKARTNFVYPSSPAQPTSTNDGLTFLNIPNSFNYTCAKSFPYQAALKDLSNRQFFHSNYSPSYGSGIRGVNGTTVATATQKSNDSLNMLLFRELLSPNSSDTTTTSLSPDTGFNSMPLYEQLPLMFSRNNTSISLNSSSSNLINHTSSSSTFLPTTNNAIIPSSSVMTLPKIENVHSINNSTTCIHDDSGMDFFPSEPSDSGLLEEALNGFFPKPKPIKSEPFPSSTKGELSEVSNIPQQINDGLNSGFEFSHTSSFPMYHQDFAANLQMSSGDNMMGDIFQYPDLLNIFAAKLQNS	392
250	Niben101Scf00846g02001.1	NBERF250	MAAVIDIYNNSTSSSNNSSFFSDPLSEELMKALEPFMKGASCSSSISPSVSPSSSSSSSSSSSPSTSSSSCFYPFGEPNFYTDFCTIPSSSFNPMGRVAETGSIELNHLTPSQIFQIQAQIQFQNQQQQLLLLQQQSLGLLPTTPTYSKSLNSINYLGLKPVPMKQSGGAVQKPTKLYRGVRQRHWGKWVAEIRLPKNRTRLWLGTFDTAEEAALAYDKAAYKLRGEFARLNFPHLRHQLNNELSDFKPLHSSVDAKLEAICQNLANSDGLSSNNNTDSKPRKSKKAASKLDSDSVQDCPENVNVKIEATSSSSPTPSEESSLSAVXDAVQDCPENVSVKIEATSSCSPTPSEESSSSPESDITFLDFIEPSFDESENFFLPKYPSVEIDWAAL	394
251	Niben101Scf04350g04004.1	NBERF251	MAPKQQGGAVAVEVTAAVGKVNEISKEVHYRGVRKRPWGRYAAEIRDPGKKSRVWLGTFDTAEEAAKAYDAAAREFRGAKAKTNFPPEEEENLKIAQNNLGVKMNTNVNDNNNRSPSQSSTVESSSRDGLSPAVMVDSSPLDLSLGVKFPFQNNQFRTSPISVGFSGCGFTGATPAVNHHMYYLETLARAGVINLENNRQRKTVDFLGGNGGHGGSGSGIQSESESSSVIDFMRNDVKPTTRPGLNLDLNFPPPENEAAKAYDAAATEFRGAKAKTNFPPQEEENLKIAQNNLGVKMITNVNDNNNRSPSQSSTVESSSRDGLSPAVMVDSSPFDLSLGVKFPFQNNQFRPSPISVGFFGCGFTGATPAVNHHMYYLEALARAGCNLSCLLVDPRHK	397
252	Niben101Scf05849g00002.1	NBERF252	MSSHILQRKQKRRRNGCDSLEEILLKWKNHYQEINSSTEDVQVKKKRKISVKRSRKGGIQGKGGPENSGCIYRGVRQRIWGKWVAEIREPVYISGQYKTSGKRLWLGTFSTSVDAALAYDEAAKVMYGSNAILNFPDYCIQNDSLSTFTIARTSSPESIDQSSVDHEDSGAEDAKIRVDQSAFATSVVTEDEKQRSCCCCLTEKSDVMPEEDYENELNDSGCSSRTDSQPPNCGVKVETPIKEEIEKDEFVHDKDLERLNSNEVSNSLHIMDEETTDVKPQDLNILQEPLDFRSSENPSEDFCKRLEYMERWLMEDDCSIEATKFLEESFHFKPMIVPQDSAELNYVKNEEQFDCTYSQQIDKQTDGIVSNQADWNSLISPQQEENIKDLSIFNFDFDI	399
253	Niben101Scf06120g00005.1	NBERF253	MATSEDYGKSIREELDDDNTFERQQRRPVFEEASISRRRFKKIKSPERQHRSQSSSSSYSQQSLSQSSVPYNNPISMSFPPPTSSSKLVFPFSFDGTQPSIQNLYQMGPNTTPLNQNQQQMISFSPQQCPYPPYFAGELGQSQNQQQLLQYWNETLNLSPRGRMMMMSRLGQDRPQLQPINTTKLYRGVRQRHWGKWVAEIRLPRNRTRLWLGTFDTAEDAAMAYDREAFKLRGESAKLNFPELFLGKDREGPSIETVESPHIKQPDQESENLQLEPLNIELLPPPQPLPPPEVENQDEDSGMGSSEVTACDEVQGVSLQSTELVWGENEMAEAWFNAIPAGWGPGSPVWDDLDTNNNFIFPSNFHFGNVAPHNSDPHNQHIHDNTDPSSPSCPMRPFF	399
254	Niben101Scf09459g02008.1	NBERF254	MENQSSKSDSYMQKELPTCYKEVAIESLSRYFKNPHILEGLNDEISLTSFPNMKEILVSSSDSTSSTKFSEFFPLNFLQNDQGNNNNNNIIPLNNFLESFHHHNQVSDHQTCSSPNSLSSNYPTLGLFLKEPSILEISKRAEESLNNKSHNQIHQQQQAAATTSTTNWLKMNQTITNCSTTKGFSDYWLSTTKTQPMKITRGSTKSSLHYNQGNQNSSSSSSSSLMATSQGKLFRGVRQRHWGKWVAEIRLPRNRTRVWLGTFDTAEEAAIAYDTAAYILRGDYAHLNFPHLKNQLKANSINGNTSALLEAKIRAISSQTKKANDHDQATKEVVLVTDDSRIKNVISQNQEMENSEKKVKNINQERLLSENNIDGVQLSRMPSLDMDMIWDALLVSDSS	399
255	Niben101Scf01075g01003.1	NBERF255	MMSDKERANDGCVGSVRKVRIIYDDPDATESESENDHNIRNVVRIKRVVKEVNISSASLEKKDSEKSSVKSSNKSLENKRVQIKSSSLPKGVRMRKWGKYAAEIRDPLQGKRIWLGTFDTVKGAAEAYDTKKAEFDRRNLSEKGKNLSSPRAPHECSTACSSHPTNSTSSLYSLPSPSSVLDVPTSSAAAAAECIDIPMKDMNPVPVVEVEQPASEIVEKQLLWPPSGCQDYNPGFEDQMLYEDPLIEQGTISDILVEMTEFNIMKKTKARQPTIEICRKSTKGIEDRHVNCADQSITSPSISAELNMMNFEETAVSGNNLKLLGFDENSLFGNDFTQTFDPYTDFIGLDSNFLCCDGLEEFVYGMNEDFRDNVGANSPKLDGVELRWLDEVLIQDQSVL	400
256	Niben101Scf06117g01012.1	NBERF256	MATSEDYSKSTTAIGEEMDEDNTFERQQRRPVFEEASISRRRFKKIKSPEHQHYSQSSTSSNSQQPLSQSSVPYNNPISMSFPPPPSSSKLIFPFSFDGTQQSIENLYQMRPNTTPLFPPQHQMISFSPQQCPYPPYFAGELGQSQNQQQLLQYWNETLNLSPRGRMMMMGRLGQDNKGLFRPQLQPISTTKLYRGVRQRHWGKWVAEIRLPRNRTRLWLGTFDTAEDAAMAYDREAFKLRGENAKLNFPELFLGKDREGPSIETVETKQPDEESESVQLEPLNIELLPPPPPPPPPEVDNQDEDSGVGSSEVTACDEVQGVTLQSTELVWGENEMAEAWFNAIPAGWGPGSPVWDDLDTNNNFIFPSNFHFGNVHSHNSDPHNQHIHDNTDPSSPSCP…	404
257	Niben101Scf00725g02012.1	NBERF257	MPCLPQELFDMMSNKERVNDGCVGSVRKVRIIYDDPDATESESENDDNTCNVVRIKRIVKEINVSSASLEKKDFEKCPIRSSNKSLENKNRNGLENKRVQIKSSSLPKGVRMRKWGKYAAEIRDPSQGKRIWLGTFDTVKAAAEAYDAKKAEFDRRILSERGKNLSSPQAPPECSTACSSHPTNRTSSLYSHPSPSSVLDVPNSSAAAAVECIDIPMKDKNPVPVLEVEQPAVECIDILDFNPKFEDQMLYKDPLIEQGTISNSLAEMTEFNITKKTKARQPTIKICQKSTKGIEDRHLNCTDQSITPPSISAELNMMNFEETAVSGNNLKLLGFDENALFGKDFSQTFDPYTDFVGLDSNFLCCDGLEEFVYGMNEDFRDNVGANSPKLDDVELRWLD…	409
258	Niben101Scf04763g00014.1	NBERF258	MSSDDQAGNAPWEEMVKEAAAAAALGGAPRARKRFVGVRQRPSGRWVAEIKDTIQKIRVWLGTFDTAEEAARAYDEAACLLRGANTRTNFWPSSSSSSSTPALPSKITNLLLTRIKARNNSLAAAAAAAAVSSSSDSSEPVEIRDQDKQLEECRDETAYFSDSQYMEYLKDPEDQITDNNMISNTSAINMSNFTNTLEACWTENDYSVVQPVMKSDENNSSGGEINDNMVEEDVEEEIEEENDSSDIGDVEPINFHFVDEIESSCYYSPFEIADEINSTDTMDQQGMVYGDESLMISEAMRRMNYERQFSASLYAFNGITECLKLKLKSGGIMQRERSEKLSRLRNACKRKRKEDEKKINEQGISAEMGERKETEYSSQSSLETGQSSLLETTYESELS…	414
259	Niben101Scf01518g08004.1	NBERF259	MSARSALSLIEFGAPLNLCFSVSSLFFALCLQFSPIISMGLRPKRNWFGEVCFGGFHIKQFLHLILLLRPPLTLYTAMFEPERLFSSDLENLKRNMKEKTDTYRKMRKIRIVCYDPDATDSSDDEWINYPKSKCFVREIKLQIGNSFSSPKASETECSFQDSNNGEKKPKQKVLAKPLIQPRQGLSKYKGVRQRKWGKWAAEIRDPFKGRRVWLGTYSTAEEASRAYELKRLEFESMAKNSTNMSQKSSDYQNQTNTNVASIPEDSAESSASRTSHSLPSSVLELDSLTSASASAPISGLNGYEKASDVALEANVVEQEVPELALMEETLSLAQIGETMDLELELEPFLIGADDFSQHLDEFVIDDFEDPPVCVIEGDDQLPTGLPDFDFNFDFDGYDE…	420
260	Niben101Scf06026g00002.1	NBERF260	MARKRRASEGLSENKTRNDDQAGNAAWEEMVKEAAAAAALGGARQARKRFVGVRQRPSGRWVAEIKDTIQKIRVWLGTFDTAEEAARAYDEAACLLRGANTRTNFWPSSSSSSSTPALPSKITNLLLNRLKARNNSLAAAAAASSSDSSEPVKIRDQDKQLEEYRDETAYFSDSQFMEYLKDSEDQITDNSMSTNTSAIAMNNFTNTLEACLNENGYSVVQPVMKTDEINSSGGEINNNIVEVDADKEEHEIEEENDSTDIGDIEPIDFHFVDEIGTSFYYSPFEIAEETDSTDTMDQLGMVYGDESLMISEAMRRMNYERKFSASLYAFNGISECLKLKLKSGGVAQRERSEQLSRLRNACKRNRKEDEKKINEEGISTKMGERKETEYTSQSSSETG…	428
261	Niben101Scf01453g11005.1	NBERF261	MALVSALSVANPGESGEHDRIPSTGGDSESTTTTTEGGIPQPYEQSFEEMLRQQIQQETDYLMSSSAAPMFSGYSQTREMSAMVTALTHVVSGRRQGELTNRPEITTSFGGGSPSSSSSGSWAGQKRRRDQEESVAAEQVQRVYGGFGEFRGGESSSSVKPEEASRMVAPPTTTSTITMTAAAQPTPQPAEGGAEETGERRKRYRGVRQRPWGKWAAEIRDPHKAARVWLGTFDTAEAAARAYDEAALRFRGNRAKLNFPENVRILPPQQQQPPQPTTRLAISSSSAASQFPLMAAATTPSHFFQTYHPQQQQQQPPFQNSEMVRDYWEYSQLLQNPDDFHAQQSSSSLLEQMLLASSSMGLLHSYTFPSCSSSSLATSSSASSPAYPLFYSAQQSRFF…	433
262	Niben101Scf01942g08004.1	NBERF262	MCLLIKVANPGESGEHDRIPSTGGDSESTTTTTTTTTEGGIPQPYEQSFEEMLRQQIQQETEYLMSSSATPMFSGYSQSREMSEMVTALTHVVSGRRQGELTYRPEVTTSFGGGSPSSSSSRSWAGQKRRRDQEESVAAEQVQRVYGGFSDSRGGESSSSVKPEEASRMVAPPTTTSTITMTAAAQPTPQPAEGGAEETGERRKRYRGVRQRPWGKWAAEIRDPHKAARVWLGTFDTAEAAARAYDEAALRFRGNRAKLNFPENARLLPQQQQQSQPTTRSAISSSSATSQFPLMAAATTPSPFFQTYQPQQQQQQPFQSAEMVRDYWEYSQLLQNPGDFHAQQSSSSLLEQMLFASSSMGLLHSHTFPSYSSSSALATSSSASSPAYPLFYSAQQSRF…	435
263	Niben101Scf04634g00008.1	NBERF263	MCFLKVANPRKSSEYVRFTDTSDSEITTTTAAEGGAQPYGQSDQFFEEMIQQQIHQEADYLLSTSSAMPMFTGYSQTREMSTMVTALTHVVSGQSYRPDISGSVTSSFGGGGSGIYSANSPSSAYSSSSSGSRAGQKRSRDQEESVTQILVQSHHGVYGGFGEFRGGLPSSSVKAEEATSMVAPSNTTISTITTVPAFTTTPTTTTAAAGGSTEETGGERRRRYRGVRQRPWGKWAAEIRDPHKAARVWLGTFDTAEAAARAYDEAALRFRGSRAKLNFPENVSRLLPQLQASQPTTRLAISSSSTSASSHLPFMAPISQPTAFFQPHQQQLQPIQSSDMTRDYWEYSQLLQNPGDFFDQQQPSGLLEQMFFASSRAVLHSNTTSSLGNSAASSPSSPL…	445
264	Niben101Scf03202g13015.1	NBERF264	MRRRRNGSTSIEETLLMWKNQKQELNANLDGGIKKKPRKFPAKGSKKGCMRGKGGPENLGCKYRGVRQRTWGKWVAEIREPVYNSNGKRLWLGTFSTAVEAAIAYDEAAKVMYGHNAMLNFPDYSVQNSELANYSTSVSIARTASLGSSESSVEDSRIEPDLQIWNTPDDGVVAITDEKTILDDPTNLCSGGRADGDPGAQQDSSVCCSNTESVIIEVDDSLDDMKGLNCSTRIDSEPILDPTSSCVKVEPPSDNDFVQDRRLECVDDPNKLSNSMHILHQRITDVKQNDSIFQHDVPNENFESGDQVLLPCEPIALPDYVCSVNTLQEQLDFRSSDNTSADIRSHLEYAEYLLMEDNNTTEATTVSDTFWLNENIGEGYNLESFLDESFDVNNLKNEE…	472
265	Niben101Scf01297g01001.1	NBERF265	MDYCGNRRMRRRRNGSASIDETLLMWKNQKQELDATLDGGIKKKRRNFPAKGSKKGCMRGKGGPENLGCKYRGVRQRTWGKWVAEIREPVYNSNGKRLWLGTFSTAVEAAIAYDEAAKAMYGHNAILNFPDYSVQDSELANYSTSVSIARTTSLESSDSSVEDSRIEPDLQTSDTPDDCVVALTDEKTILDDPTNLCSDGIADGDPGAQQDSSVCCLNMESVVIEVDDSLDGIKDLNCSTRIESEPIIEPTSSRVKVETPSDNDFVQDRRLECVDDPIKVSNSLHILHQEMIDVKPNDSIFQHDVLNENYEYGDQVLLPCDPIALPDYDCSANALQEQPLDFRSSDNTSADIHSHLEYREYLLMEDNNTMEATTVSDTFWLNENIGESYNLESFLDESF…	481
266	Niben101Scf02242g03012.1	NBERF266	MSLMVSALTHVVAGEDRLNHQILTDENVATENNFGSGFSSVSWGVGEKRGREQQQSSQQFLHGSSGITSSVYIVNFGVSAYWRFLPSRSILLVEVDYFICIYKVANSRDKIYSRRRSHEDRDRDDNYNVLESMFSGNINREEEMSLMVSALTHVVAGEDRLNHQILTDENVATENNFGSGFSSVSWGVGEKRGREQQQSSQQFLHGSSGITSSGGEGTSIRTITSSTPTTEATFIYTCTNDHQNSSSDQSSGGDNNNDQARRRYRGVRQRPWGKWAAEIRDPYKATRVWLGTFDTAEAAARAYDEAALKFRGSKAKLNFPENVKLLPSPLFSDSPNTLYSVSSSPDPILHTSLYRPNFIEYPLRDDEPVVHTSQYCSNFIERPRTDEPILHTAHNQALN…	483
